# Sox1a mediates the ability of the parapineal to impart habenular left-right asymmetry

Ingrid Lekk<sup>1,2</sup>, Véronique Duboc<sup>3,4</sup>, Ana Faro<sup>1</sup>, Stephanos Nicolaou<sup>1,5</sup>, Patrick Blader<sup>3</sup>, Stephen W. Wilson<sup>1</sup>

<sup>1</sup> Department of Cell and Developmental Biology, University College London, Gower Street, London WC1E 6BT, UK.

<sup>2</sup> Center for Brain Research, Medical University of Vienna, Spitalgasse 4, 1090 Vienna, Austria

<sup>3</sup> Centre de Biologie Intégrative (FR 3743), Centre de Biologie du Développement (UMR5547), Université de Toulouse, CNRS, F-31062 Toulouse, France

<sup>4</sup> Université Côte d'Azur, CHU, Inserm, CNRS, IRCAN, France

<sup>5</sup> Division of Cancer Therapeutics, The Institute of Cancer Research, 15 Cotswold Road, Sutton, London SM2 5NG

Correspondence: [i.lekk.12@ucl.ac.uk](mailto:i.lekk.12@ucl.ac.uk); [s.wilson@ucl.ac.uk](mailto:s.wilson@ucl.ac.uk)

## Abstract

Left-right asymmetries in the zebrafish habenular nuclei are dependent upon the formation of the parapineal, a unilateral group of neurons that arise from the medially positioned pineal complex. In this study, we show that both the left and right habenula are competent to adopt left-type molecular character and efferent connectivity upon the presence of only a few parapineal cells. This ability to impart left-sided character is lost in parapineal cells lacking Sox1a function, despite the normal specification of the parapineal itself. Precisely timed laser ablation experiments demonstrate that the parapineal influences neurogenesis in the left habenula at early developmental stages as well as neurotransmitter phenotype and efferent connectivity during subsequent stages of habenular differentiation. These studies reveal a tight coordination between the formation of the unilateral parapineal nucleus and emergence of asymmetric habenulae, ensuring that appropriate lateralised character is propagated within left and right-sided circuitry.

## Introduction

15 Although once considered to be a mark of cognitive superiority of the human cortex, it is  
now clear that left-right asymmetries are a consistent feature of all vertebrate brains  
studied, as well as invertebrate nervous systems (Alqadah et al., 2018; Concha et al., 2012;  
Duboc et al., 2015; Frasnelli, 2013; Frasnelli et al., 2012; Rogers, 2014). Lateralisation of  
brain function has many potential advantages, such as sparing energetically expensive brain  
20 tissue, decreasing reaction time by avoiding eliciting incompatible responses, providing an  
advantage in motor learning and facilitating coordinated behaviour in social animals  
(Concha et al., 2012; Rogers, 2014; Rogers, 2013; Vallortigara and Rogers, 2005). Not only  
does evolutionary conservation of brain asymmetries emphasise the importance of  
hemispheric lateralisation, but it also allows comparative developmental and behavioural  
25 studies between species.

Zebrafish (*Danio rerio*) have become an advantageous model organism in studying  
brain asymmetries owing to their rapid embryonic development, amenability to genetic  
manipulation, as well conveniently small size and transparency for developmental imaging  
and behavioural analysis. With respect to CNS lateralisation, the focus has long been on the  
30 epithalamus which displays overt left-right asymmetries in structure and function not only  
in zebrafish but in a large number of vertebrates, albeit the extent and laterality of these  
asymmetries varies greatly between different groups (Aizawa et al., 2011; Concha and  
Wilson, 2001).

The epithalamus is a dorsal subdivision of the diencephalon constituted by bilateral  
35 habenular nuclei and a medially positioned pineal complex. The habenula (Hb) is a  
phylogenetically old brain structure, which functions as a relay station conveying  
information from the limbic forebrain and sensory systems to the ventral midbrain (Aizawa  
et al., 2011; Bianco and Wilson, 2009), whereas the pineal has a conserved role in melatonin  
release and regulation of circadian rhythms (Ekstrom and Meissl, 2003; Sapede and Cau,  
40 2013). The pineal complex also contains a photoreceptive accessory nucleus in some  
species: a frontal organ in anuran amphibians, a parietal eye in some species of lizards and a  
parapineal nucleus in jawless and teleost fish (Concha and Wilson, 2001).

Epithalamic asymmetries in larval zebrafish manifest at many levels in both the  
pineal complex and the habenulae. The zebrafish habenulae are divided into dorsal and

45 ventral habenula (dHb, vHb) on both sides, corresponding to mammalian medial and lateral  
habenula, respectively (Aizawa et al., 2005; Amo et al., 2010). No overt asymmetries have  
been described in the zebrafish vHb, whereas the left and right dHb exhibit overt  
differences in cytoarchitecture and molecular signature (Concha et al., 2000; Concha et al.,  
2003; Gamse et al., 2003), as well as afferent and efferent connectivity (Aizawa et al., 2005;  
50 Bianco et al., 2008; Gamse et al., 2005; Krishnan et al., 2014; Miyasaka et al., 2009; Turner  
et al., 2016; Zhang et al., 2017) and function (Agetsuma et al., 2010; Dreosti et al., 2014;  
Facchin et al., 2015; Krishnan et al., 2014; Zhang et al., 2017). The left and right dHb can be  
further divided into lateral and medial subdomains. The lateral subnucleus (dHbL) is larger  
on the left side and projects mainly to the dorsal interpeduncular nucleus (IPN), whereas the  
55 medial subnucleus (dHbM) is enlarged on the right side and projects exclusively to the  
ventral IPN (Aizawa et al., 2005; Bianco et al., 2008; Gamse et al., 2005). Therefore, left-right  
asymmetries in the zebrafish dHb are translated into laterotopic dorsoventral innervation of  
the midbrain IPN. This organisation is conserved amongst teleost and jawless fish (Signore  
et al., 2009; Stephenson-Jones et al., 2012; Villalon et al., 2012) but is not obvious in  
60 mammals (Kuan et al., 2007a). Rather than overt structural asymmetries, mammalian  
habenular asymmetries manifest at the level of neuronal activity, possibly to allow more  
flexible lateralisation of habenular circuit function (Ichijo et al., 2016). Mammalian  
habenular asymmetries have also predominantly been observed in the lateral rather than  
the medial Hb (Hetu et al., 2016; Ichijo et al., 2015; Savitz et al., 2011a; Savitz et al., 2011b).  
65 It has been hypothesised that the asymmetric connectivity of the dHb in fishes might reflect  
the division in processing sensory *versus* forebrain contextual input, whereas in mammals  
such division is lost due to lack of direct sensory input to the epithalamus (Stephenson-  
Jones et al., 2012). The light-sensitive parapineal nucleus is one such example of an  
asymmetric sensory functions in the epithalamus of teleost fish and lampreys (Borg, 1983;  
70 Yanez et al., 1999).

In addition to its possible photosensory function, the left-sided parapineal is also  
essential for the development of most left-right asymmetries in the zebrafish habenulae.  
Hence, mutants in which the parapineal is not properly specified (Clanton et al., 2013;  
Regan et al., 2009; Snelson et al., 2008) or in experimental setups where the parapineal is  
75 laser-ablated at early developmental stages (Aizawa et al., 2005; Bianco et al., 2008; Concha  
et al., 2003; Gamse et al., 2005; Gamse et al., 2003), left dHb characteristics fail to develop

and the habenulae exhibit right isomerism (a double-right phenotype). One of the mechanisms possibly influenced by the parapineal is the differential timing of neurogenesis in the left and right dHb. As shown by 5-bromo-2-deoxyuridine (BrdU) birth-date analysis, neurogenesis peaks at 32 hpf in the dHbL (more prominent on the left) and at 50 hpf in the dHbM (more prominent on the right) (Aizawa et al., 2007). However, the early onset of asymmetric neurogenesis, marked by expression of the neuronal marker *cxcr4b* specifically in the left dHb, can already be detected at 28 hpf and requires left-sided epithalamic Nodal signalling (Roussigne et al., 2009). Around that time, left-sided Nodal signalling also determines the direction of parapineal migration – in the case of absent or bilateral epithalamic Nodal signalling, parapineal migration is randomised and consequently habenular asymmetries are reversed in 50% of the embryos (Aizawa et al., 2005; Concha et al., 2000). Since the asymmetries in Nodal-dependent habenular neurogenesis are very subtle, biasing the migration of the parapineal to the left side might provide a mechanism to further enhance left dHb neurogenesis.

In this study, we address the role of the Sox family transcription factor encoding gene *sox1a* in mediating the ability of the parapineal to influence habenular development. Zebrafish *sox1a* and *sox1b* have arisen from an ancestral vertebrate *Sox1* gene during teleost genome duplication (Bowles et al., 2000) and show largely overlapping expression at early stages from 21 somites to 25 hours post fertilisation (hpf) in the telencephalon, hypothalamus, eye field, early lateral line and otic vesicle primordia, trigeminal placode, lens and spinal cord interneurons (Gerber et al., 2019; Okuda et al., 2006). However, *sox1a*-specific expression has been detected in the lateral line primordium at 24 hpf (Gerber et al., 2019) and in the parapineal from 26-28 hpf onwards, but not the pineal anlage from which the parapineal arises (Clanton et al., 2013). Hence, *Sox1a* is a candidate transcription factor for being involved in parapineal specification and/or the role of the parapineal in imparting habenular asymmetry.

Through analysis of the role of *sox1a* in epithalamic development, we find that the parapineal forms and migrates normally in *sox1a*<sup>-/-</sup> mutant zebrafish larvae but the habenulae exhibit right isomerism. Furthermore, transplants of a few wild-type parapineal cells are able to rescue epithalamic asymmetries in *sox1a*<sup>-/-</sup> embryos and induce left-dHb characteristics in both left and right habenula. A time-course of parapineal ablations reveals a previously unsuspected step-wise regulation of habenula development by the parapineal.

Our results highlight the essential role of the parapineal and of Sox1a in asymmetric  
110 development of adjacent habenula.

## Results

### ***sox1a* is expressed in the developing parapineal from the onset of its formation**

Whole mount *in situ* hybridisation analysis showed that *sox1a* is expressed in the parapineal  
from the onset of its formation between 26-28 hpf (*Figure 1A-D''*) (Clanton et al., 2013).  
115 Fluorescent *in situ* labelling of *sox1a* mRNA in embryos expressing the Tg(*foxD3:GFP*) and  
Tg(*flh:eGFP*) transgenes in the whole pineal complex (Concha et al., 2003) revealed that  
*sox1a* is first expressed in a few cells located on the left side of the forming parapineal at 28  
hpf, and thereafter in all parapineal cells as they undergo collective migration to the left  
side of the epithalamus (*Figure 2A*). Additionally, *sox1a* is expressed in other areas such as  
120 the lens vesicle, anterior forebrain, ventral diencephalon, hindbrain and pharyngeal arches  
(*Figure 1A-D'*), as has also been described previously (Gerber et al., 2019; Okuda et al.,  
2006; Thisse, 2004).

Parapineal-specific expression of *sox1a* raises two questions: firstly, is *sox1a* function  
required for parapineal specification and secondly – considering the essential role of the  
125 parapineal in elaborating left-sided dHb character (Aizawa et al., 2005; Bianco et al., 2008;  
Concha et al., 2003; Gamse et al., 2005; Gamse et al., 2003) – is *sox1a* involved in the  
regulation of habenular asymmetry?

### **The parapineal forms in *sox1a*<sup>-/-</sup> mutants**

Using CRISPR/Cas9 genome editing (Auer et al., 2014a; Auer et al., 2014b; Gagnon et al.,  
130 2014; Talbot and Amacher, 2014), we generated two *sox1a* mutant lines (*Figure 2 – figure  
supplement 1*). The *sox1a*<sup>ups8</sup> allele (hereafter referred to as *sox1a*<sup>-/-</sup>), has an 11 bp deletion  
in the single exon of the *sox1a* gene, which leads to a premature stop codon at amino acid  
62. As a result, the mutant Sox1a protein lacks the HMG DNA binding domain and is  
predicted to be non-functional. Indeed, no *sox1a* mRNA was detected in the parapineal of  
135 mutant embryos (*Figure 2B*) suggesting nonsense mediated decay of the mutant transcript.  
The second *sox1a*<sup>u5039</sup> allele has a 10 bp deletion leading to a premature stop at amino acid  
134 leaving the HMG DNA binding domain intact. Both *sox1a*<sup>-/-</sup> mutants show no overt

developmental abnormalities and are viable as adults. However, further analyses showed some variable expressivity of the phenotypes described below in the *sox1a*<sup>u5039</sup> mutant allele and consequently the *sox1a*<sup>ups8</sup> allele was used for all experiments.

Using Tg(*foxD3:GFP*) and Tg(*flh:eGFP*) transgenes to label parapineal cells, we observed that the parapineal migrated with normal timing and trajectory in *sox1a*<sup>-/-</sup> mutants (Figure 2A-B). This indicates that Sox1a is neither required for parapineal specification nor for migration. Furthermore, parapineal-specific expression of the transcription factor encoding genes *otx5* (Gamse et al., 2002) and *gfi1ab* (Dufourcq et al., 2004) was not affected in the *sox1a*<sup>-/-</sup> mutants (Figure 2C-D).

Although parapineal neurons form in *sox1a*<sup>-/-</sup> mutants, efferent projections to the left habenula show reduced outgrowth and no branching (Figure 2E). This phenotype does not necessarily reflect a cell autonomous deficit in the parapineal neurons as the changes in the left dHb of *sox1a*<sup>-/-</sup> mutants (see below) are likely to impact its innervation by parapineal axons.

### ***sox1a*<sup>-/-</sup> mutants and morphants have a double-right dHb similar to parapineal-ablated larvae**

Ablation studies have shown that the presence of a parapineal is required for the left dHb to elaborate left-sided patterns of gene expression and connectivity (Aizawa et al., 2005; Bianco et al., 2008; Concha et al., 2003; Gamse et al., 2005; Gamse et al., 2003). Consequently, we assessed both normally asymmetric habenular gene expression and efferent connectivity of habenular neurons in *sox1a*<sup>-/-</sup> mutants.

Despite normal parapineal specification and migration, *sox1a*<sup>-/-</sup> mutants have a double-right dHb phenotype (Figure 3A'-E') compared to wild-type siblings (Figure 3A-E). Hence, the predominantly left-sided expression of *kctd12.1* (n=45) (Gamse et al., 2003) and *nrp1a* (n=46) (Kuan et al., 2007a) was markedly reduced in all *sox1a*<sup>-/-</sup> mutants (Figure 3A-A' and B-B'). Conversely, there was increased expression of *kctd8* (n=46) (Gamse et al., 2005) and *VACHTb* (n=41) (Hong et al., 2013), which are normally expressed at higher levels in the right dHb (Figure 3C-C' and D-D'). Similar results were obtained for *sox1a* morphants (Figure 3 – figure supplement 1) and the two *sox1a* mutant alleles (*sox1a*<sup>ups8</sup>, *sox1a*<sup>u5039</sup>) failed to complement, with trans-heterozygotes for the two alleles showing the same double-right dHb phenotype as *sox1a*<sup>ups8</sup> homozygotes (*sox1a*<sup>-/-</sup>) (Figure 3 – figure supplement 2).

The overtly symmetric double-right habenular phenotype in *sox1a*<sup>-/-</sup> mutants and morphants is comparable to the double-right habenulae development upon parapineal ablation at early stages (before parapineal migration at 30 hpf) (*Figure 3A''-D''*) (also previously shown in Concha et al., 2003; Gamse et al., 2003). This indicates that the forming parapineal in *sox1a*<sup>-/-</sup> mutants is not functional in terms of regulating left dHb development. Note that the residual asymmetry in *kctd12.1* mRNA expression in the dorsomedial domain of left dHb apparent in mutants, morphants and parapineal-ablated larvae alike (asterisk in *Figure 3A'-A''* and *Figure 3 – figure supplement 1D'*), is similar to what has previously been described for residual asymmetries in habenular neuropil upon early parapineal ablation (Bianco et al., 2008; Concha et al., 2003). These asymmetries might be the result of Nodal-dependent neurogenesis in the left dHb, that is potentially independent from parapineal-regulated habenular asymmetries (Roussigne et al., 2009).

The symmetric double-right habenular phenotype of *sox1a*<sup>-/-</sup> mutants was also evident in the efferent habenular projections to the IPN, as shown by anterograde axon tracing via lipophilic dye labelling (*Figure 3E-E'*). In *sox1a*<sup>-/-</sup> mutants, dorsal IPN innervation which normally arises from dHbL neurons (more prominent on the left) was almost completely lost and both dHb projected predominantly to the ventral IPN (n=15), the target of dHbM neurons (Aizawa et al., 2005; Bianco et al., 2008; Gamse et al., 2005). This indicates that in *sox1a*<sup>-/-</sup> mutants, most left dHb neurons have adopted dHbM character similar to the right dHb. Comparable efferent dHb projections predominantly targeting the ventral IPN were observed in early parapineal ablated embryos (*Figure 3E''*), as previously described (Aizawa et al., 2005; Bianco et al., 2008; Gamse et al., 2005), confirming that the parapineal fails to signal to the left habenula in absence of Sox1a function.

In summary, loss of function of the transcription factor Sox1a leads to double-right dHb phenotype similar to parapineal-ablated larvae, despite normal parapineal formation in the mutants.

#### 195 **A wild-type parapineal induces left habenula characteristics in *sox1a*<sup>-/-</sup> mutants**

The results described above are consistent with Sox1a in parapineal cells regulating the ability of these cells to impart left-sided character to the left dHb. However, as *sox1a* is expressed elsewhere in and around the nervous system, it is also possible that the habenular phenotype is a consequence of a role for Sox1a outside of the parapineal. To

200 directly test whether Sox1a function is required within the parapineal to elicit habenular phenotypes, we transplanted wild-type parapineal cells or control pineal cells into *sox1a*<sup>-/-</sup> Tg(*foxD3:GFP*);(*flh:eGFP*) embryos at 32 hpf, either to the left or right side of the endogenous pineal complex and assessed dHb character at 4 dpf (*Figure 4*). Subsequent to transplantation, 3-4 transplanted parapineal cells with projections to the adjacent habenula  
205 could be detected by live imaging at 50 hpf (*Figure 4A-B* and *4D-E*), whereas transplanted control pineal cells usually re-integrated into the pineal (*Figure 4C* and *4F*).

By 4 dpf, transplanted wild-type parapineal cells induced left dHb characteristics in the adjacent (left or right) habenula of *sox1a*<sup>-/-</sup> mutants (*Figure 4A'-B'*, *4D'-E'*; n=11), whereas embryos with pineal-cell transplants still exhibited a double-right dHb phenotype  
210 (*Figure 4C'* and *4F'*; n=5). Hence, while the expression of the left dHb marker *kctd12.1* in *sox1a*<sup>-/-</sup> mutants with pineal-cell transplants (n=3) was symmetric (double-right) (*Figure 4C'*), *kctd12.1* expression in *sox1a*<sup>-/-</sup> mutants with wildtype parapineal cells on the left side (n=2) resembled the wild-type condition (higher expression on the left) (*Figure 4A'*) and *kctd12.1* expression in *sox1a*<sup>-/-</sup> mutants with parapineal cells on the right side (n=2) had a reversed  
215 phenotype (higher expression on the right) (*Figure 4B'*). Furthermore, the left or right dHb in *sox1a*<sup>-/-</sup> mutants positioned adjacent to the transplanted wild-type parapineal cells innervated the dorsal IPN (*Figure 4D'* and *4E'*) (n=4 and n=3, respectively) comparable to the left dHb of wild type larvae, whereas *sox1a*<sup>-/-</sup> mutants with pineal-cell transplants showed innervation of the ventral IPN from both left and habenula (n=2) (*Figure 4F'*). Transplanted  
220 wild-type parapineal cells sent out extensive axonal projections, as can be distinguished in cells transplanted to the right side where there are no endogenous parapineal cells (white arrows in *Figure 4B-B'* and *4E-E'*).

As expected, transplanted parapineal cells were also able to induce left dHb characteristics in wild-type right habenula, with as few as two parapineal cells being  
225 sufficient to change the laterality of the adjacent right dHb (n=2; *Figure 4 – figure supplement 1*). Although it is surprising that so few parapineal cells can have such a large effect, the result is consistent with “failed” parapineal ablation experiments in which only one or two parapineal cells remained. In such embryos, the left dHb still elaborated normal left-sided character (*Figure 5 – figure supplement 1B-B'*).

230 To conclude, *sox1a*<sup>-/-</sup> habenulae are competent to respond to wild-type parapineal signals and adopt left-type character, confirming that the *sox1a*<sup>-/-</sup> double-right habenular



phenotype results from impaired signalling between the parapineal and the left dHb. Furthermore, both left and right habenula are competent to acquire left dHb character in response to parapineal signals, demonstrating that it is the left-sided migration of the parapineal that underlies asymmetric development of the zebrafish epithalamus.

### **The parapineal regulates habenular asymmetry at several developmental stages**

The temporal progression in the elaboration of habenular asymmetry spans from early asymmetric neurogenesis starting on the left side as early as 28 hpf (Aizawa et al., 2007; Roussigne et al., 2009) to neuronal differentiation (deCarvalho et al., 2014; Husken and Carl, 2013; Husken et al., 2014) and establishment of asymmetric connectivity by 4 dpf (Aizawa et al., 2005; Beretta et al., 2017; Bianco et al., 2008; Carl et al., 2007; deCarvalho et al., 2013; Gamse et al., 2005; Hendricks and Jesuthasan, 2007; Kuan et al., 2007b; Turner et al., 2016; Zhang et al., 2017). Hence, the parapineal might regulate the early initiation of neurogenesis in the left dHb, whereby cells are born into an environment that promotes dHbL differentiation, as opposed to later neurogenesis which favours dHbM fate on the right (Aizawa et al., 2007). Alternatively or concomitantly, signals from the parapineal might be needed at later stages to impart and/or maintain dHbL specification and/or asymmetric habenular connectivity. To gain insight into which aspects of habenular development are regulated by the parapineal, we carried out laser ablations of the parapineal in *Tg(foxD3:GFP);(flh:eGFP)* fish at 30 hpf, 35 hpf, 50 hpf and 3 dpf and studied the effects on the expression pattern of different habenular markers at 4 dpf as well as habenular efferent projections to the IPN (Figure 5).

In line with previous studies (Bianco et al., 2008; Concha et al., 2003; Gamse et al., 2003), early ablations at 30 hpf led to overtly double-right habenula development, as was evident for all studied markers (*kctd12.1*, n=25; *nrp1a*, n=6; *VACHTb*, n=11) (Figure 5B, G, L) as well as for efferent projections (n=3) (Figure 5Q). In contrast, parapineal ablations at 35 hpf (n=16) and 50 hpf (n=15) did not obviously affect *kctd12.1* expression at 4 dpf (Figure 5C, D). Volumetric analysis did reveal a mild reduction in the average volume of the left dHb *kctd12.1* domain upon 35 and 50 hpf ablations compared to controls (data not shown) but the larvae had obvious asymmetric (left-dominant) *kctd12.1* expression patterns compared to double-right 30 hpf ablation phenotype. These results are in line with the fact that the early wave of asymmetric neurogenesis (predominantly in the left dHb) takes place at

around 32 hpf (Aizawa et al., 2007) and would therefore – if regulated by the parapineal – not be affected by ablations later than 32 hpf.

265 Surprisingly, however, parapineal ablations at 35 and 50 hpf still led to development of double-right efferent projections to the IPN by 4 dpf (*Figure 5R, S*; n=14 and n=12, respectively), potentially as a consequence of the reduction in axon guidance receptor *nrp1* gene expression in the left dHb upon 35 and 50 hpf parapineal ablations (*Figure 5H, I*; n=7 and n=21, respectively) (Kuan et al., 2007b). Furthermore, 4 dpf *VACHTb* mRNA expression  
270 was also affected by 35 hpf (n=8) and 50 hpf (n=11) parapineal ablations (*Figure 5M, N*), indicating that asymmetric neurotransmitter domains are not correctly established upon late parapineal ablations. Partial parapineal ablations at 50 hpf or parapineal axotomies did not affect the asymmetry of habenular efferent projections (*Figure 5 – figure supplement 1*). Finally, upon parapineal ablations at 3 dpf, all studied habenular asymmetries were of wild-  
275 type character at 4 dpf (*Figure 5E, J, O, T*; n=7, n=14, n=15 and n=6, respectively), consistent with previous data showing that ablation at this stage does not affect lateralised functional properties of habenular neurons (Dreosti et al., 2014).

These results indicate that habenular asymmetries are regulated at several developmental stages by the parapineal, firstly at the time of left dHb neurogenesis and  
280 thereafter at the level of differentiation (axonal outgrowth and neurotransmitter domains).

### **Asymmetric habenular neurogenesis is regulated by the parapineal**

The parapineal ablation experiments described above are consistent with the, as yet untested, possibility that the parapineal promotes early, asymmetric neurogenesis in the left dHb. This could contribute to promotion of dHbL character (more prominent on the  
285 left), as dHbL neurons tend to be born earlier than dHbM neurons (more prominent on the right) (Aizawa et al., 2007). To assess if the parapineal does influence dHb neurogenesis, we carried out BrdU birth-date analysis for dHb neurons in wild-type and parapineal-ablated embryos. Control and 30 hpf parapineal-ablated *Tg(foxD3:GFP);(flh:eGFP)* embryos were exposed to a 20-minute BrdU pulse at 32 hpf, followed by a chase period until 4 dpf to allow  
290 differentiation of the habenular neurons. The number of neurons born around 32 hpf were visualised with BrdU immunofluorescence and habenular asymmetries were assessed by *kctd12.1 in situ* hybridisation (*Figure 6A-B'*).

Birthdating analysis demonstrated that the parapineal does influence neurogenesis in the left dHb. In control wild-type embryos (n=22), significantly more cells were born in the left dHb compared to the right at 32 hpf as expected ( $p < 6 \times 10^{-5}$ , Wilcoxon signed rank test) (Figure 6C). This asymmetry between the left and right dHb was markedly reduced in parapineal-ablated embryos (n=18,  $p = 0.002$ , Wilcoxon signed rank test), due to decreased neurogenesis in the left dHb compared to controls ( $p = 0.004$ , Wilcoxon-Mann-Whitney test), while the right habenula was unaffected ( $p = 0.478$ , Wilcoxon-Mann-Whitney test) (Figure 6C). Concomitantly, *kctd12.1* expression revealed the expected double-right dHb phenotype in the parapineal-ablated embryos (Figure 6B).

These results demonstrate that the parapineal is required for the early wave of neurogenesis that is more prominent in the left dHb. The residual asymmetry in the number of BrdU positive cells between the left and right dHb in parapineal-ablated embryos most likely results from a Nodal-dependent (and parapineal-independent) influence upon neurogenesis (Roussigne et al., 2009).

## Discussion

Using two alternative approaches – cell ablations/transplants and genetic manipulation – we have shown that epithalamic asymmetries in zebrafish are determined by the unilateral parapineal nucleus. Parapineal cells are able to induce left habenula characteristics in both left and right habenula and in fish lacking function of the transcription factor Sox1a, this inductive ability of the parapineal is lost.

### The parapineal regulates step-wise development of habenular asymmetries

By means of precisely timed laser-ablations, this study has revealed that the parapineal regulates several steps of habenula development. While early parapineal ablations (30 hpf) resulted in double-right dHb, late parapineal ablations (at 35 hpf and 50 hpf) led to loss of some differentiated dHb characteristics (lateralised *nrp1a* and *VAcHT* expression, laterotopic efferent connectivity) but not others (*kctd12.1* expression). Furthermore, by partial ablations and cell transplants, we have shown that parapineal cells are remarkably potent at inducing left dHb character in both, left and right habenula with only a few cells being sufficient.

BrdU labelling demonstrated that at early stages of development, the parapineal promotes neurogenesis in the left dHb. This adds a second mechanism contributing to asymmetric neurogenesis in the habenulae in addition to left-sided Nodal signalling (Roussigne et al., 2009). What is the function of such dual regulation? Habenular neurogenic asymmetries in catshark are regulated by left-sided Nodal signalling (Lagadec et al., 2018) and *ktcd* genes in lamprey and catshark habenula are asymmetrically expressed independently from the parapineal, which in catshark is not even present (Lagadec et al., 2015). However, in zebrafish, Nodal plays only a minor role in the early onset of asymmetric habenular neurogenesis prior to the formation of the parapineal (Roussigne et al., 2009), whereas the major wave of left-sided habenular neurogenesis takes place at 32 hpf (Aizawa et al., 2007) and requires the migrating parapineal (this study). The redundant role of Nodal in the development of habenular asymmetry in zebrafish is also apparent from parapineal transplant experiments in which parapineal cells induced left habenula characteristics on the right side (this study), where the Nodal pathway is not activated (Bisgrove et al., 2000; Concha et al., 2000).

In light of these observations, it is tempting to hypothesise that during teleost evolution, the left-sided parapineal has become a dominant signalling centre in the regulation of habenular asymmetries, whereas left-sided Nodal pathway activation is primarily required for determination of laterality (left-sided migration of the parapineal (Concha et al., 2000; Concha et al., 2003; Gamse et al., 2003) and parapineal size (Garric et al., 2014). In this scenario, the parapineal has taken over an ancestral role of Nodal in the regulation of habenular neurogenesis, possibly due to restrictions in developmental timing and duration of Nodal cascade activity (Signore and Concha, 2017; Signore et al., 2016).

Moreover, the parapineal might have become essential in adding complexity to asymmetries in the habenulae in fishes, namely by regulating the establishment of asymmetric neurotransmitter domains and/or habenular connectivity. To date, laterotopic innervation of the IPN from the medial (teleost dorsal) habenula has only been clearly demonstrated in species with an apparent parapineal nucleus (jawless and teleost fish) (Aizawa et al., 2005; Bianco et al., 2008; Gamse et al., 2005; Signore et al., 2009; Stephenson-Jones et al., 2012; Villalon et al., 2012), even though various degrees of asymmetry in habenular size and subnuclear organisation are present in species representative of most vertebrate classes (Concha and Wilson, 2001; Roussigne et al.,

2012). Hence, the yet to be discovered function of the unilateral connections between the  
355 parapineal and the left dHb might have co-evolved with mechanisms regulating the  
development of habenular efferent connectivity, whereby the parapineal ensures the  
downstream propagation of lateralised habenular circuitry. Currently, the role of the  
parapineal in the regulation of habenular circuitry development in various fishes other than  
teleosts (zebrafish) remains elusive but such knowledge would greatly enhance our  
360 understanding of molecular and cellular mechanisms underlying evolutionary changes in  
vertebrate brain lateralisation.

### ***sox1a*<sup>-/-</sup> mutants have symmetric habenulae with largely double-right character**

Zebrafish have long been an excellent model to study genetic regulation of brain asymmetry  
from development to function (Concha et al., 2012; Concha et al., 2009; Duboue, 2017;  
365 Roussigne et al., 2012). Here we have shown that the double-right habenula phenotype of  
*sox1a*<sup>-/-</sup> mutants is identical to that in parapineal-ablated larvae, revealing a genetic factor  
behind the development of epithalamic asymmetries in zebrafish. Furthermore, the normal  
formation and migration of the parapineal in *sox1a*<sup>-/-</sup> mutants despite loss of Sox1a in the  
parapineal indicates that Sox1a specifically functions in the regulation of signalling between  
370 the parapineal and left dHb rather than in parapineal specification.

Despite broad expression of *sox1a* in the embryonic zebrafish brain, *sox1a*<sup>-/-</sup> mutants  
do not seem to have severe developmental defects other than loss of dHb asymmetry.  
However, the other teleost *sox1* paralogue – *sox1b* – has a nearly identical expression  
pattern with *sox1a* at early stages with the exception of the parapineal (Gerber et al., 2019;  
375 Okuda et al., 2006), and 80% sequence similarity with *sox1a* in the ORF, suggesting that  
these two *sox1* genes are likely to have redundant functions in the developing CNS.  
Likewise, redundant functions of B1 *sox* genes have been described for the *Sox1* knock-out  
mouse, in which formation of the lens (where only *Sox1* is expressed) is severely disrupted  
whereas the CNS shows only mild developmental abnormalities (due to overlapping  
380 expression of *Sox1* with *Sox2* and *Sox3*) (Economou et al., 2005; Malas et al., 2003;  
Nishiguchi et al., 1998). The functional redundancy between B1 *sox* genes has also been  
suggested in early embryogenesis of zebrafish by combinations of *sox2/3/19a/19b* knock-  
downs (Okuda et al., 2010).

In *sox1a*<sup>-/-</sup> mutants, the parapineal forms normally, although parapineal cells do not  
385 send fully developed projections to the left habenula. Rather than a cell-autonomous  
phenotype, this is most likely a secondary effect due to left habenula character not being  
specified. Indeed, previous studies have shown that lateralised afferent innervation of the  
dHb depends on the lateralised character of the left and right dHb (deCarvalho et al., 2013;  
Dreosti et al., 2014). It is also unlikely that any of the double-right dHb characteristics  
390 described here for *sox1a*<sup>-/-</sup> mutant larvae are caused by the abnormal extension of  
parapineal axons as parapineal axotomies have no apparent effect on asymmetric  
habenular efferent connectivity.

To conclude, the parapineal-specific expression of *sox1a* and the overlapping  
expression of different B1 *sox* genes in the rest of the zebrafish CNS renders the *sox1a*<sup>-/-</sup>  
395 mutant a valuable model for studying genetic regulation of brain asymmetry development  
in a context without overt defects in other aspects of brain development.

## Conclusions

Here, we have shown that the parapineal is essential for the development of habenular  
asymmetries in the larval zebrafish at several stages. *sox1a* mutant fish exhibit an almost  
400 complete loss of left habenula characteristics despite the formation of a parapineal nucleus  
providing an excellent genetic tool to study the signalling events responsible for establishing  
habenular asymmetries. In addition, precise, time-controlled parapineal ablation and  
transplant experiments demonstrate the step-wise manner of habenula asymmetry  
regulation by the parapineal and the incredible potency of the parapineal cells to induce left  
405 habenula characteristics in both left and right habenulae.

## Materials and methods

### Fish lines and maintenance

Zebrafish (*Danio rerio*) were maintained in the University College London Fish Facility at  
28°C and standard light conditions (14 h light/10 h dark). Embryos were obtained from  
410 natural spawning, raised at 28.5°C and staged as hours or days post fertilisation (hpf, dpf)  
according to (Kimmel et al., 1995). 0.003% 1-phenyl-2-thiourea (PTU) was added to the

water at 24-26 hpf to prevent pigmentation. For live-imaging, 0.04 mg/ml (0.02%) Tricaine (ethyl 3-aminobenzoate methanesulfonate) (Sigma) was added to the water for anesthesia. Previously established fish lines used in this study were Tg(*foxD3:GFP*);(*flh:eGFP*) (Concha et al., 2003) from incross of Tg(*foxD3:GFP*)<sup>zf104</sup> and Tg(*flh:eGFP*)<sup>U711</sup> (Concha et al., 2003; Gilmour et al., 2002) and Et(*gata2a:eGFP*)<sup>pku588</sup> (Wen et al., 2008).

### Fixation and dissection

Embryos and larvae were fixed in 4% (w/v) paraformaldehyde (PFA) in phosphate buffered saline (PBS) by over-night immersion at 4°C. For BrdU immunohistochemistry and lipophilic dye labelling, the brain of 4 dpf larvae was dissected out by manual dissection with larvae pinned in sylgard (Turner et al., 2014).

### Generation of *sox1a*<sup>-/-</sup> mutants by CRISPR/cas9

*sox1a* mutant lines were generated by CRISPR/Cas9 targeted genome editing relying on non-homologous end joining repair mechanism, as described in detailed protocols provided by (Auer et al., 2014b; Gagnon et al., 2014; Talbot and Amacher, 2014). Optimal target sites were selected using the CHOPCHOP web tool (Montague et al., 2014). *cas9* mRNA was transcribed from a plasmid provided by (Jao et al., 2013) using Ambion mMACHINE mMACHINE Kit. Guide RNAs were generated by PCR and transcribed using HiScribe T7 High-Yield RNA Synthesis Kit (NEB). 110-140 pg of guide RNA and 170 pg of *cas9* mRNA per embryo was injected at one-cell stage into the cell. Mutants were screened by high resolution melt analysis (HRMA) (Dahlem et al., 2012) using Biorad Precision Melt Supermix and confirmed by Sanger sequencing. The mutated sequences are shown in Figure 2 – figure supplement 1. Mutants were genotyped for all further experiments by allelic discrimination via KASP™ chemistry using PCR primers designed™ by the manufacturer (LGC Genomics) and the CFX™ Connect Real-Time PCR Detection system (BIO-RAD) for detection and analysis.

### Whole-mount in situ hybridisation (ISH, FISH)

Digoxigenin (Roche) labelled RNA probes were made using standard protocols and spanned a minimum of 800 bp. To enhance permeabilisation, fixed embryos or larvae were dehydrated in methanol for a minimum of one hour at -20°C, rehydrated in PBST (PBS with 0.5% Tween-20, Sigma) and treated with 0.02 mg/ml proteinase K (PK, Sigma) for 10-40

minutes depending on the age of the fish. Probe hybridisation was carried out at 70°C in standard hybridisation solution containing 50% formamide over-night, with 2 ng/μl of RNA probe. Embryos were washed at 70°C through a graded series of hybridisation solution and 2x saline sodium citrate (SSC), followed by further washes with 0.2x SSC and PBST at room temperature. Blocking was carried out in maleic acid buffer (150 mM maleic acid, 100 mM NaCl, 2% sheep serum, 2 mg/ml BSA) for 2-3 hours. Probes were detected by over-night incubation with anti-Digoxigenin-AP Fab fragments (1:5000) (Roche) and stained with standard Nitro Blue Tetrazolium (NBT) and 5-Bromo-4-chloro-3-indolyl phosphate (BCIP) (Roche) ISH protocol. Fluorescent *in situ* hybridisation (FISH) was carried out using either Fast Red tablets according to manufacturer's instructions (Roche, discontinued from manufacturing) or Fast Blue BB Salt (Sigma) and NAMP (Sigma) staining as previously described (Lauter et al., 2011).

#### **Whole-mount immunohistochemistry**

Fixed larvae were stained and imaged as whole-mounts following standard procedures (Shanmugalingam et al., 2000; Turner et al., 2014). In short, samples were dehydrated in methanol for a minimum of one hour at -20°C, rehydrated in PBST and treated with 0.02 mg/ml proteinase K (PK, Sigma) for 10-40 minutes depending on the age of the fish. 10% Heat-inactivated Normal Goat Serum (NGS) (Sigma) was used for block and for over-night primary antibody incubation at 4°C with the following antibodies: rabbit anti-GFP (dilution 1:1000, Torrey Pines Biolabs, Cat# TP401), mouse anti-acetylated tubulin (dilution 1:250, IgG2b, α-tubulin, Sigma Cat# T7451) and mouse monoclonal anti-BrdU antibody (1:450, Roche, Cat# 11170376001). Secondary antibody incubation was carried out over night at 4°C using Alexa Fluor 488-conjugated, 568-conjugated and 647-conjugated secondary antibodies (1:200, Molecular Probes, Cat# A32731, A21144, A21126). For immunohistochemistry after *in situ* hybridisation, probe hybridisation was carried out at a lower temperature (65-68°C) to ensure high-quality immunolabelling. After Fast Red or Fast Blue *in situ* hybridisation, samples were washed 6x20 minutes in PBST followed by primary antibody incubation in PBST without NGS and immunohistochemistry as usual.



### Neural tract tracing

470 Tracing of habenula efferent projections was carried out by labelling with membrane-bound lipophilic dyes Dil (DiI18(3), Molecular Probes, Cat# D3911) and DiD (DiI18(5), Molecular Probes, Cat# D7757) in 4 dpf embryos. To that end, immobilised embryos (pinned down from the body with needles) were dissected to expose the brain. For a dorsal view, embryos were then placed between two needles and under a stereomicroscope, crystals of Dil (left 475 dHb) and DiD (right dHb) were manually applied to dorsal habenulae with electrolytically sharpened tungsten needles. Brains were incubated in PBS overnight at 4°C, mounted in 1.5% low melting point agarose (Sigma) in PBS and imaged by confocal laser scanning microscopy. The success rate of bilateral labelling was approximately 60%.

### Parapineal transplants

480 Tg(*foxD3:GFP*);(*flh:eGFP*) donor embryos were pressure-injected with *in vitro* transcribed *H2B-RFP* (*histone 2B-RFP*) mRNA at one-cell stage. At 30-32 hpf, parapineal cells from donor embryos were needle aspirated (outer diameter of the needle 1.5 µm) and transplanted into Tg(*foxD3:GFP*);(*flh:eGFP*) or Tg(*sox1a<sup>-/-</sup>*);(*foxD3:GFP*);(*flh:eGFP*) recipient embryos of the same stage using a CellTram Vario oil-based manual piston pump (Eppendorf). For this, 485 donor and recipient embryos were manually dechorionated and mounted on a glass slide in 1.5% low melting point agarose (Sigma) in fish water with 0.04 mg/ml Tricaine for anesthesia. At 50 hpf the transplants were live-imaged with a two-photon microscope – embryos with transplanted cells adjacent to the pineal were raised to 4 dpf and fixed in 4% PFA (w/v) in PBS at 4°C overnight for further analysis. The N-number of parapineal 490 transplant experiments is limited by the low success rate – at 30-32 hpf the neuroepithelium is rather thin and transplanted cells often fall into the ventricle. Out of the successful transplants, approximately 10% can be detected the following day and further analysed. The survival rate of the embryos that go through the transplantation procedure is 100%.

### Parapineal laser-ablations and axotomies

495 Two-photon laser-ablations of the parapineal cells and for parapineal axotomies were carried out with in Tg(*foxD3:GFP*);(*flh:eGFP*) embryos with double-transgenic GFP expression in the pineal complex (Concha et al., 2003), using Leica 25x/0.95 NA PL FLUOROTAR water-dipping objective on a Leica TCS SP8 Confocal microscope coupled with a

500 multiphoton system (Chameleon Compact OPO-Vis, Coherent) and an environmental chamber at 28.5°C. Embryos were manually dechorionated and immobilised by mounting on a glass slide in a drop of 1.5% low melting point agarose (Sigma) in fish water with 0.04 mg/ml Tricaine for anesthesia. Ablations were carried out at 2-3 separate z-planes, using 30-60% of the maximum output laser power (80 mW) at the wavelength of 910 nm. Each scan took on average 5-10 seconds per z-plane. For 30 hpf parapineal ablations, 1/3 of the pineal complex anlage was removed from its anterior end, the position of parapineal precursors (Concha et al., 2003). Embryos were removed from agarose directly after the ablations. Ablation success was confirmed by live confocal imaging the next day. The success rate for parapineal two-photon ablations (all cells ablated) is approximately 80% at 35 and 50 hpf but lower (60%) for 30 hpf ablations (due to regeneration of the parapineal) and 3 dpf ablations (possibly due to the compact structure of the parapineal and the blood vessels covering it). Each experiment was carried out in 2-3 separate replicates with the exception of previously published results (indicated where appropriate), which were confirmed once. The N-numbers for all ablation experiments are given in the Results section. Ablated embryos were analysed with a comparable number of control embryos (embryos mounted in agarose but not ablated).

515 Axotomies were performed at 30-40% laser power by 2-3 pulses at 910 nm using the Bleach Point function on Leica Application Suite X (LAS X) software. The axon bundle was severed approximately 10 µm from the cell body at three time-points (due to regeneration) – at 50, 60 and 72 hpf. The embryos were removed from agarose in between these time points to ensure normal development. Axotomy success was confirmed by live confocal imaging of the pineal complex at 4 dpf before fixation and dissection for lipophilic labelling.

### **BrdU birth-date analysis**

525 5-bromo-2-deoxyuridine (BrdU) labelling was carried out in in *Tg(foxD3:GFP);(flh:eGFP)* wild-type and parapineal-ablated embryos. Parapineal ablations were performed at 30 hpf as described above, after which parapineal-ablated embryos and non-ablated controls were immediately recovered from agarose. At 32 hpf, embryos were subjected to BrdU labelling. Embryos were incubated in Claw 1xE3 embryo medium (5 mM NaCl, 0.17 mM KCl, 0.33 mM CaCl<sub>2</sub>, 0.33 mM MgSO<sub>4</sub>) with 15% DMSO (Sigma, Cat# 276855) for 5 minutes on ice, followed by 20-minute 10 mM BrdU (Sigma, Cat# B5002) incubation in Claw 1xE3 embryo

530 medium with 15% DMSO on ice. At 50 hpf, parapineal-ablated embryos and non-ablated controls were mounted in agarose and ablation success was confirmed by live confocal imaging. Fail-ablated embryos (with at least one parapineal cell left unablated and/or with a damaged pineal) were excluded from further analysis. At 4 dpf, larvae were fixed and dissected to expose the brain. Brain dissection also leads to loss of the superficially  
535 positioned pineal complex in most cases. Fast Red (Roche, discontinued from manufacturing) fluorescent *in situ* hybridisation for *kctd12.1* followed by BrdU immunohistochemistry was carried out as described, with an added step of 45-minute 2N HCl treatment to expose the BrdU epitope prior to antibody staining. BrdU-positive cells from 3D reconstructions were counted using semi-automated detection in Imaris 7.7.1  
540 (Bitplane) software. The experiment was repeated three times and the results were analysed using GraphPad Prism 8.0.2 software. The N-numbers were limited by high technical difficulty of combining parapineal ablations and BrdU staining in a sort window of time (30-32 hpf), allowing recovery between the two experiments. The data did not show clear normal distribution and therefore non-parametric tests were used for statistical  
545 analysis. Wilcoxon-Mann-Whitney test was carried out for unpaired comparisons of BrdU cell counts between control and parapineal-ablated embryos. Wilcoxon signed rank test was used for paired analysis of BrdU cell counts in the left and right habenula.

### Image analysis

Confocal imaging was carried out using a Leica TCS SP8 system with a 25x/0.95 NA PL  
550 FLUOROTAR water-dipping objective for live-imaging or 25x/0.95 NA PL IRAPO water-immersion objective with coverslip correction for fixed samples. Image analysis was performed using Fiji (ImageJ) and Imaris 7.7.1 (Bitplane) software. Images and figures were assembled using Adobe Photoshop and Adobe Illustrator.

### Acknowledgements

555 We thank all members of our labs in UCL and at the CBI Toulouse for support, the UCL and CBI Fish Facilities for help with fish maintenance and the zebrafish research community in London for fruitful discussions.

## Author contributions

560 IL and VD designed the research with input from AF, PB and SWW. VD generated the *sox1a<sup>ups8</sup>* mutant line and performed initial phenotypic analyses; IL confirmed and extended the phenotypic analyses in both *sox1a* mutant lines and performed ablation and transplantation experiments; SN carried out morpholino experiments together with IL. All authors contributed to interpretation of data. IL and SW wrote the article with input from all authors.

## 565 Competing interests:

The authors declare no competing interests.

## Funding

570 This study was supported by a Wellcome Trust Investigator Award to SWW (104682/Z/14/Z), a Wellcome Trust studentship to IL (099749/Z/12/Z), a Fondation ARC post-doctoral fellowship and a grant from Fondation Fyssen to VD, and funding from Fondation ARC (RA14P0040), the Fondation pour la Recherche Médicale (DEQ20130326466) and the Agence National de la Recherche (ANR-16-CE13-0013-01) to PB.

## References

- 575 **Agetsuma, M., Aizawa, H., Aoki, T., Nakayama, R., Takahoko, M., Goto, M., Sassa, T., Amo, R., Shiraki, T., Kawakami, K., et al. (2010).** The habenula is crucial for experience-dependent modification of fear responses in zebrafish. *Nature neuroscience* **13**, 1354-1356.
- Aizawa, H., Amo, R. and Okamoto, H. (2011).** Phylogeny and ontogeny of the habenular structure. *Frontiers in neuroscience* **5**, 138.
- 580 **Aizawa, H., Bianco, I. H., Hamaoka, T., Miyashita, T., Uemura, O., Concha, M. L., Russell, C., Wilson, S. W. and Okamoto, H. (2005).** Laterotopic representation of left-right information onto the dorso-ventral axis of a zebrafish midbrain target nucleus. *Current biology : CB* **15**, 238-243.
- Aizawa, H., Goto, M., Sato, T. and Okamoto, H. (2007).** Temporally regulated asymmetric neurogenesis causes left-right difference in the zebrafish habenular structures. *Developmental cell* **12**, 87-98.
- 585 **Alqadah, A., Hsieh, Y. W., Morrissey, Z. D. and Chuang, C. F. (2018).** Asymmetric development of the nervous system. *Developmental dynamics : an official publication of the American Association of Anatomists* **247**, 124-137.
- 590 **Amo, R., Aizawa, H., Takahoko, M., Kobayashi, M., Takahashi, R., Aoki, T. and Okamoto, H. (2010).** Identification of the zebrafish ventral habenula as a homolog of the mammalian lateral habenula. *The Journal of neuroscience : the official journal of the Society for Neuroscience* **30**, 1566-1574.
- Auer, T. O., Durore, K., Concordet, J. P. and Del Bene, F. (2014a).** CRISPR/Cas9-mediated conversion of eGFP- into Gal4-transgenic lines in zebrafish. *Nature protocols* **9**, 2823-2840.
- 595 **Auer, T. O., Durore, K., De Cian, A., Concordet, J. P. and Del Bene, F. (2014b).** Highly efficient CRISPR/Cas9-mediated knock-in in zebrafish by homology-independent DNA repair. *Genome research* **24**, 142-153.
- 600 **Beretta, C. A., Dross, N., Guglielmi, L., Bankhead, P., Soulika, M., Gutierrez-Triana, J. A., Paolini, A., Poggi, L., Falk, J., Ryu, S., et al. (2017).** Early Commissural Diencephalic Neurons Control Habenular Axon Extension and Targeting. *Current biology : CB* **27**, 270-278.
- Bianco, I. H., Carl, M., Russell, C., Clarke, J. D. and Wilson, S. W. (2008).** Brain asymmetry is encoded at the level of axon terminal morphology. *Neural development* **3**, 9.
- 605 **Bianco, I. H. and Wilson, S. W. (2009).** The habenular nuclei: a conserved asymmetric relay station in the vertebrate brain. *Philosophical transactions of the Royal Society of London. Series B, Biological sciences* **364**, 1005-1020.
- Bisgrove, B. W., Essner, J. J. and Yost, H. J. (2000).** Multiple pathways in the midline regulate concordant brain, heart and gut left-right asymmetry. *Development* **127**, 3567-3579.
- 610

- Borg, B., Ekstrom, P., Van Veen, T.** (1983). The parapineal organ of teleosts. *Acta Zoolog.* **64**, 211-218.
- Bowles, J., Schepers, G. and Koopman, P.** (2000). Phylogeny of the SOX family of developmental transcription factors based on sequence and structural indicators. *Developmental biology* **227**, 239-255.
- 615
- Carl, M., Bianco, I. H., Bajoghli, B., Aghaallaei, N., Czerny, T. and Wilson, S. W.** (2007). Wnt/Axin1/beta-catenin signaling regulates asymmetric nodal activation, elaboration, and concordance of CNS asymmetries. *Neuron* **55**, 393-405.
- Clanton, J. A., Hope, K. D. and Gamse, J. T.** (2013). Fgf signaling governs cell fate in the zebrafish pineal complex. *Development* **140**, 323-332.
- 620
- Concha, M. L., Bianco, I. H. and Wilson, S. W.** (2012). Encoding asymmetry within neural circuits. *Nature reviews. Neuroscience* **13**, 832-843.
- Concha, M. L., Burdine, R. D., Russell, C., Schier, A. F. and Wilson, S. W.** (2000). A nodal signaling pathway regulates the laterality of neuroanatomical asymmetries in the zebrafish forebrain. *Neuron* **28**, 399-409.
- 625
- Concha, M. L., Russell, C., Regan, J. C., Tawk, M., Sidi, S., Gilmour, D. T., Kapsimali, M., Sumoy, L., Goldstone, K., Amaya, E., et al.** (2003). Local tissue interactions across the dorsal midline of the forebrain establish CNS laterality. *Neuron* **39**, 423-438.
- Concha, M. L., Signore, I. A. and Colombo, A.** (2009). Mechanisms of directional asymmetry in the zebrafish epithalamus. *Seminars in cell & developmental biology* **20**, 498-509.
- 630
- Concha, M. L. and Wilson, S. W.** (2001). Asymmetry in the epithalamus of vertebrates. *Journal of anatomy* **199**, 63-84.
- Dahlem, T. J., Hoshijima, K., Jurynech, M. J., Gunther, D., Starker, C. G., Locke, A. S., Weis, A. M., Voytas, D. F. and Grunwald, D. J.** (2012). Simple methods for generating and detecting locus-specific mutations induced with TALENs in the zebrafish genome. *PLoS Genet* **8**, e1002861.
- 635
- deCarvalho, T. N., Akitake, C. M., Thisse, C., Thisse, B. and Halpern, M. E.** (2013). Aversive cues fail to activate fos expression in the asymmetric olfactory-habenula pathway of zebrafish. *Frontiers in neural circuits* **7**, 98.
- deCarvalho, T. N., Subedi, A., Rock, J., Harfe, B. D., Thisse, C., Thisse, B., Halpern, M. E. and Hong, E.** (2014). Neurotransmitter map of the asymmetric dorsal habenular nuclei of zebrafish. *Genesis* **52**, 636-655.
- 640
- Dreosti, E., Vendrell Llopis, N., Carl, M., Yaksi, E. and Wilson, S. W.** (2014). Left-right asymmetry is required for the habenulae to respond to both visual and olfactory stimuli. *Current biology : CB* **24**, 440-445.
- 645
- Duboc, V., Dufourcq, P., Blader, P. and Roussigne, M.** (2015). Asymmetry of the Brain: Development and Implications. *Annual review of genetics* **49**, 647-672.
- Duboue, E. R., Halpern M. E.** (2017). Genetic and Transgenic Approaches to Study Zebrafish Brain Asymmetry and Lateralized Behavior. In *Lateralized Brain Functions: Methods in Human and Non-Human Species* (ed. V. G. Rogers L. J.). New York City, US: Humana Press.
- 650

- Dufourcq, P., Rastegar, S., Strahle, U. and Blader, P.** (2004). Parapineal specific expression of *gf1* in the zebrafish epithalamus. *Gene expression patterns : GEP* **4**, 53-57.
- Ekonomou, A., Kazanis, I., Malas, S., Wood, H., Alifragis, P., Denaxa, M., Karagogeos, D., Constanti, A., Lovell-Badge, R. and Episkopou, V.** (2005). Neuronal migration and ventral subtype identity in the telencephalon depend on SOX1. *PLoS biology* **3**, e186.
- Ekstrom, P. and Meissl, H.** (2003). Evolution of photosensory pineal organs in new light: the fate of neuroendocrine photoreceptors. *Philosophical transactions of the Royal Society of London. Series B, Biological sciences* **358**, 1679-1700.
- Facchin, L., Duboue, E. R. and Halpern, M. E.** (2015). Disruption of Epithalamic Left-Right Asymmetry Increases Anxiety in Zebrafish. *The Journal of neuroscience : the official journal of the Society for Neuroscience* **35**, 15847-15859.
- Frasnelli, E.** (2013). Brain and behavioral lateralization in invertebrates. *Frontiers in psychology* **4**, 939.
- Frasnelli, E., Vallortigara, G. and Rogers, L. J.** (2012). Left-right asymmetries of behaviour and nervous system in invertebrates. *Neuroscience and biobehavioral reviews* **36**, 1273-1291.
- Gagnon, J. A., Valen, E., Thyme, S. B., Huang, P., Ahkmetova, L., Pauli, A., Montague, T. G., Zimmerman, S., Richter, C. and Schier, A. F.** (2014). Efficient mutagenesis by Cas9 protein-mediated oligonucleotide insertion and large-scale assessment of single-guide RNAs. *PloS one* **9**, e98186.
- Gamse, J. T., Kuan, Y. S., Macurak, M., Brosamle, C., Thisse, B., Thisse, C. and Halpern, M. E.** (2005). Directional asymmetry of the zebrafish epithalamus guides dorsoventral innervation of the midbrain target. *Development* **132**, 4869-4881.
- Gamse, J. T., Shen, Y. C., Thisse, C., Thisse, B., Raymond, P. A., Halpern, M. E. and Liang, J. O.** (2002). *Otx5* regulates genes that show circadian expression in the zebrafish pineal complex. *Nature genetics* **30**, 117-121.
- Gamse, J. T., Thisse, C., Thisse, B. and Halpern, M. E.** (2003). The parapineal mediates left-right asymmetry in the zebrafish diencephalon. *Development* **130**, 1059-1068.
- Garric, L., Ronsin, B., Roussigne, M., Booton, S., Gamse, J. T., Dufourcq, P. and Blader, P.** (2014). *Pitx2c* ensures habenular asymmetry by restricting parapineal cell number. *Development* **141**, 1572-1579.
- Gerber, V., Yang, L., Takamiya, M., Ribes, V., Gourain, V., Peravali, R., Stegmaier, J., Mikut, R., Reischl, M., Ferg, M., et al.** (2019). The HMG box transcription factors Sox1a and Sox1b specify a new class of glycinergic interneuron in the spinal cord of zebrafish embryos. *Development* **146**.
- Gilmour, D. T., Maischein, H. M. and Nusslein-Volhard, C.** (2002). Migration and function of a glial subtype in the vertebrate peripheral nervous system. *Neuron* **34**, 577-588.
- Hendricks, M. and Jesuthasan, S.** (2007). Asymmetric innervation of the habenula in zebrafish. *The Journal of comparative neurology* **502**, 611-619.
- Hetu, S., Luo, Y., Saez, I., D'Ardenne, K., Lohrenz, T. and Montague, P. R.** (2016). Asymmetry in functional connectivity of the human habenula revealed by high-resolution cardiac-gated resting state imaging. *Human brain mapping* **37**, 2602-2615.

- 695 **Hong, E., Santhakumar, K., Akitake, C. A., Ahn, S. J., Thisse, C., Thisse, B., Wyart, C., Mangin, J. M. and Halpern, M. E.** (2013). Cholinergic left-right asymmetry in the habenulo-interpeduncular pathway. *Proceedings of the National Academy of Sciences of the United States of America* **110**, 21171-21176.
- Husken, U. and Carl, M.** (2013). The Wnt/beta-catenin signaling pathway establishes neuroanatomical asymmetries and their laterality. *Mechanisms of development* **130**, 330-335.
- 700 **Husken, U., Stickney, H. L., Gestri, G., Bianco, I. H., Faro, A., Young, R. M., Roussigne, M., Hawkins, T. A., Beretta, C. A., Brinkmann, I., et al.** (2014). Tcf7l2 is required for left-right asymmetric differentiation of habenular neurons. *Current biology : CB* **24**, 2217-2227.
- 705 **Ichijo, H., Hamada, M., Takahashi, S., Kobayashi, M., Nagai, T., Toyama, T. and Kawaguchi, M.** (2015). Lateralization, maturation, and anteroposterior topography in the lateral habenula revealed by ZIF268/EGR1 immunoreactivity and labeling history of neuronal activity. *Neuroscience research* **95**, 27-37.
- Ichijo, H., Nakamura, T., Kawaguchi, M. and Takeuchi, Y.** (2016). An Evolutionary Hypothesis of Binary Opposition in Functional Incompatibility about Habenular Asymmetry in Vertebrates. *Frontiers in neuroscience* **10**, 595.
- 710 **Jao, L. E., Wente, S. R. and Chen, W.** (2013). Efficient multiplex biallelic zebrafish genome editing using a CRISPR nuclease system. *Proceedings of the National Academy of Sciences of the United States of America* **110**, 13904-13909.
- 715 **Kimmel, C. B., Ballard, W. W., Kimmel, S. R., Ullmann, B. and Schilling, T. F.** (1995). Stages of embryonic development of the zebrafish. *Developmental dynamics : an official publication of the American Association of Anatomists* **203**, 253-310.
- Krishnan, S., Mathuru, A. S., Kibat, C., Rahman, M., Lupton, C. E., Stewart, J., Claridge-Chang, A., Yen, S. C. and Jesuthasan, S.** (2014). The right dorsal habenula limits attraction to an odor in zebrafish. *Current biology : CB* **24**, 1167-1175.
- 720 **Kuan, Y. S., Gamse, J. T., Schreiber, A. M. and Halpern, M. E.** (2007a). Selective asymmetry in a conserved forebrain to midbrain projection. *Journal of experimental zoology. Part B, Molecular and developmental evolution* **308**, 669-678.
- Kuan, Y. S., Yu, H. H., Moens, C. B. and Halpern, M. E.** (2007b). Neuropilin asymmetry mediates a left-right difference in habenular connectivity. *Development* **134**, 857-865.
- 725 **Lagadec, R., Laguerre, L., Menuet, A., Amara, A., Rocancourt, C., Pericard, P., Godard, B. G., Rodicio, M. C., Rodriguez-Moldes, I., Mayeur, H., et al.** (2015). The ancestral role of nodal signalling in breaking L/R symmetry in the vertebrate forebrain. *Nature communications* **6**, 6686.
- 730 **Lagadec, R., Lanoizelet, M., Sanchez-Farias, N., Herard, F., Menuet, A., Mayeur, H., Billoud, B., Rodriguez-Moldes, I., Candal, E. and Mazan, S.** (2018). Neurogenetic asymmetries in the catshark developing habenulae: mechanistic and evolutionary implications. *Scientific reports* **8**, 4616.



- Lauter, G., Soll, I. and Hauptmann, G.** (2011). Two-color fluorescent in situ hybridization in the embryonic zebrafish brain using differential detection systems. *BMC developmental biology* **11**, 43.
- 735 **Malas, S., Postlethwaite, M., Ekonomou, A., Whalley, B., Nishiguchi, S., Wood, H., Meldrum, B., Constanti, A. and Episkopou, V.** (2003). Sox1-deficient mice suffer from epilepsy associated with abnormal ventral forebrain development and olfactory cortex hyperexcitability. *Neuroscience* **119**, 421-432.
- 740 **Miyasaka, N., Morimoto, K., Tsubokawa, T., Higashijima, S., Okamoto, H. and Yoshihara, Y.** (2009). From the olfactory bulb to higher brain centers: genetic visualization of secondary olfactory pathways in zebrafish. *The Journal of neuroscience : the official journal of the Society for Neuroscience* **29**, 4756-4767.
- Montague, T. G., Cruz, J. M., Gagnon, J. A., Church, G. M. and Valen, E.** (2014). CHOPCHOP: a CRISPR/Cas9 and TALEN web tool for genome editing. *Nucleic Acids Res* **42**, W401-407.
- 745 **Nishiguchi, S., Wood, H., Kondoh, H., Lovell-Badge, R. and Episkopou, V.** (1998). Sox1 directly regulates the gamma-crystallin genes and is essential for lens development in mice. *Genes & development* **12**, 776-781.
- Okuda, Y., Ogura, E., Kondoh, H. and Kamachi, Y.** (2010). B1 SOX Coordinate Cell Specification with Patterning and Morphogenesis in the Early Zebrafish Embryo. *Plos Genet* **6**.
- 750 **Okuda, Y., Yoda, H., Uchikawa, M., Furutani-Seiki, M., Takeda, H., Kondoh, H. and Kamachi, Y.** (2006). Comparative genomic and expression analysis of group B1 sox genes in zebrafish indicates their diversification during vertebrate evolution. *Developmental dynamics : an official publication of the American Association of Anatomists* **235**, 811-825.
- 755 **Regan, J. C., Concha, M. L., Roussigne, M., Russell, C. and Wilson, S. W.** (2009). An Fgf8-dependent bistable cell migratory event establishes CNS asymmetry. *Neuron* **61**, 27-34.
- Rogers, L. J.** (2014). Asymmetry of brain and behavior in animals: Its development, function, and human relevance. *Genesis* **52**, 555-571.
- Rogers, L. J. V., G.; Andrew R.J.** (2013). *Divided brains: The biology and behaviour of brain asymmetries*. Cambridge: Cambridge University Press.
- 760 **Roussigne, M., Bianco, I. H., Wilson, S. W. and Blader, P.** (2009). Nodal signalling imposes left-right asymmetry upon neurogenesis in the habenular nuclei. *Development* **136**, 1549-1557.
- 765 **Roussigne, M., Blader, P. and Wilson, S. W.** (2012). Breaking symmetry: the zebrafish as a model for understanding left-right asymmetry in the developing brain. *Developmental neurobiology* **72**, 269-281.
- Sapede, D. and Cau, E.** (2013). The pineal gland from development to function. *Current topics in developmental biology* **106**, 171-215.
- 770 **Savitz, J. B., Bonne, O., Nugent, A. C., Vythilingam, M., Bogers, W., Charney, D. S. and Drevets, W. C.** (2011a). Habenula volume in post-traumatic stress disorder measured with high-resolution MRI. *Biology of mood & anxiety disorders* **1**, 7.
- Savitz, J. B., Nugent, A. C., Bogers, W., Roiser, J. P., Bain, E. E., Neumeister, A., Zarate, C. A., Jr., Manji, H. K., Cannon, D. M., Marrett, S., et al.** (2011b). Habenula volume in bipolar

- disorder and major depressive disorder: a high-resolution magnetic resonance imaging study. *Biological psychiatry* **69**, 336-343.
- 775 **Shanmugalingam, S., Houart, C., Picker, A., Reifers, F., Macdonald, R., Barth, A., Griffin, K., Brand, M. and Wilson, S. W.** (2000). *Ace/Fgf8* is required for forebrain commissure formation and patterning of the telencephalon. *Development* **127**, 2549-2561.
- Signore, I. A. and Concha, M. L.** (2017). Heterochrony and Morphological Variation of Epithalamic Asymmetry. *Journal of experimental zoology. Part B, Molecular and developmental evolution* **328**, 157-164.
- 780 **Signore, I. A., Guerrero, N., Loosli, F., Colombo, A., Villalon, A., Wittbrodt, J. and Concha, M. L.** (2009). Zebrafish and medaka: model organisms for a comparative developmental approach of brain asymmetry. *Philosophical transactions of the Royal Society of London. Series B, Biological sciences* **364**, 991-1003.
- 785 **Signore, I. A., Palma, K. and Concha, M. L.** (2016). Nodal signalling and asymmetry of the nervous system. *Philosophical transactions of the Royal Society of London. Series B, Biological sciences* **371**.
- Snelson, C. D., Santhakumar, K., Halpern, M. E. and Gamse, J. T.** (2008). *Tbx2b* is required for the development of the parapineal organ. *Development* **135**, 1693-1702.
- 790 **Stephenson-Jones, M., Floros, O., Robertson, B. and Grillner, S.** (2012). Evolutionary conservation of the habenular nuclei and their circuitry controlling the dopamine and 5-hydroxytryptophan (5-HT) systems. *Proceedings of the National Academy of Sciences of the United States of America* **109**, E164-173.
- Talbot, J. C. and Amacher, S. L.** (2014). A streamlined CRISPR pipeline to reliably generate zebrafish frameshifting alleles. *Zebrafish* **11**, 583-585.
- 795 **Thisse, B., Thisse, C.** (2004). Fast Release Clones: A High Throughput Expression Analysis. *ZFIN Direct Data Submission*.
- Turner, K. J., Bracewell, T. G. and Hawkins, T. A.** (2014). Anatomical dissection of zebrafish brain development. *Methods in molecular biology* **1082**, 197-214.
- 800 **Turner, K. J., Hawkins, T. A., Yanez, J., Anadon, R., Wilson, S. W. and Figueira, M.** (2016). Afferent Connectivity of the Zebrafish Habenulae. *Frontiers in neural circuits* **10**, 30.
- Vallortigara, G. and Rogers, L. J.** (2005). Survival with an asymmetrical brain: advantages and disadvantages of cerebral lateralization. *The Behavioral and brain sciences* **28**, 575-589; discussion 589-633.
- 805 **Villalon, A., Sepulveda, M., Guerrero, N., Meynard, M. M., Palma, K. and Concha, M. L.** (2012). Evolutionary plasticity of habenular asymmetry with a conserved efferent connectivity pattern. *PloS one* **7**, e35329.
- Wen, L., Wei, W., Gu, W., Huang, P., Ren, X., Zhang, Z., Zhu, Z., Lin, S. and Zhang, B.** (2008). Visualization of monoaminergic neurons and neurotoxicity of MPTP in live transgenic zebrafish. *Developmental biology* **314**, 84-92.
- 810 **Yanez, J., Pombal, M. A. and Anadon, R.** (1999). Afferent and efferent connections of the parapineal organ in lampreys: a tract tracing and immunocytochemical study. *The Journal of comparative neurology* **403**, 171-189.

815 **Zhang, B. B., Yao, Y. Y., Zhang, H. F., Kawakami, K. and Du, J. L. (2017). Left Habenula Mediates Light-Preference Behavior in Zebrafish via an Asymmetrical Visual Pathway. *Neuron* **93**, 914-928 e914.**

## Figures

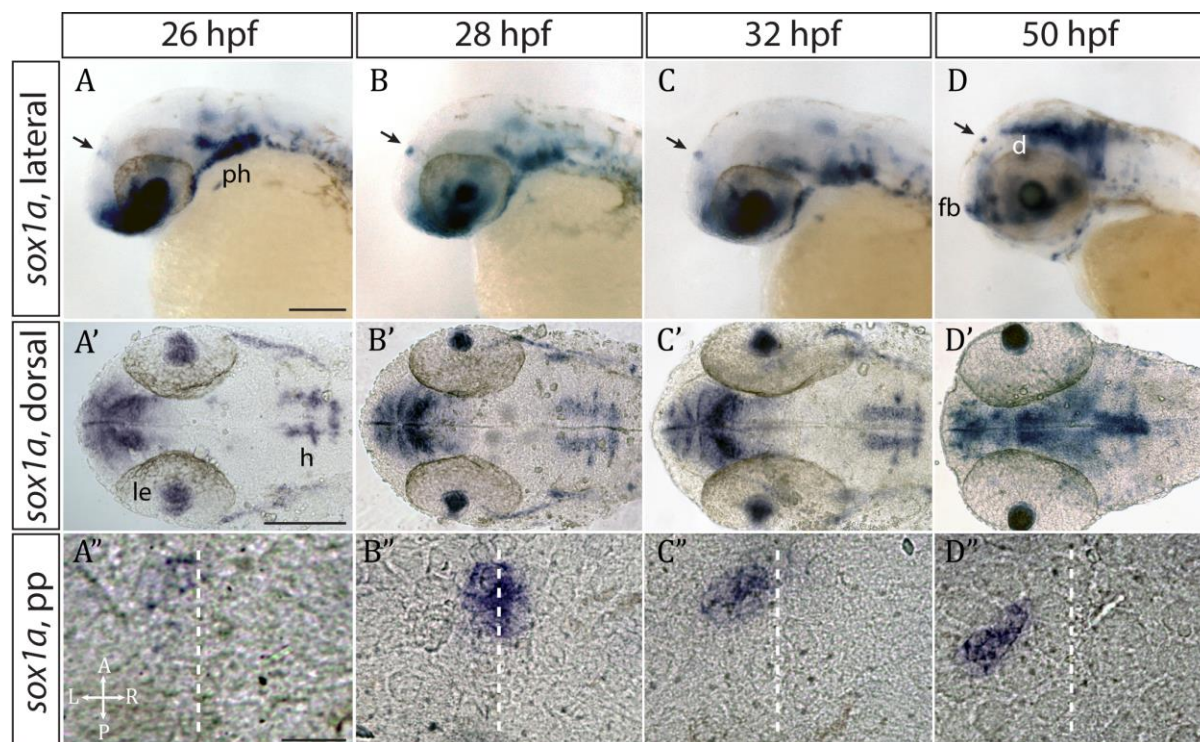

820 **Figure 1: *sox1a* is expressed in the parapineal from the onset of its formation.**

**(A-D')** Lateral (A-D) and dorsal (A'-D') views of zebrafish embryos showing *sox1a* mRNA expression at stages indicated. In addition to the parapineal (indicated by black arrows in A-D), *sox1a* is also expressed in the lens vesicle (le), hindbrain (h) and pharyngeal arches (ph). At 50 hpf, *sox1a* is also detected in the ventral diencephalon (d) and the anterior forebrain (fb). Scale bars 100  $\mu$ m.

825 **(A''-D'')** Dorsal views of the epithalamus showing *sox1a* mRNA expression in the migrating parapineal at stages shown above. Dashed line indicates the midline. Scale bars 25  $\mu$ m.

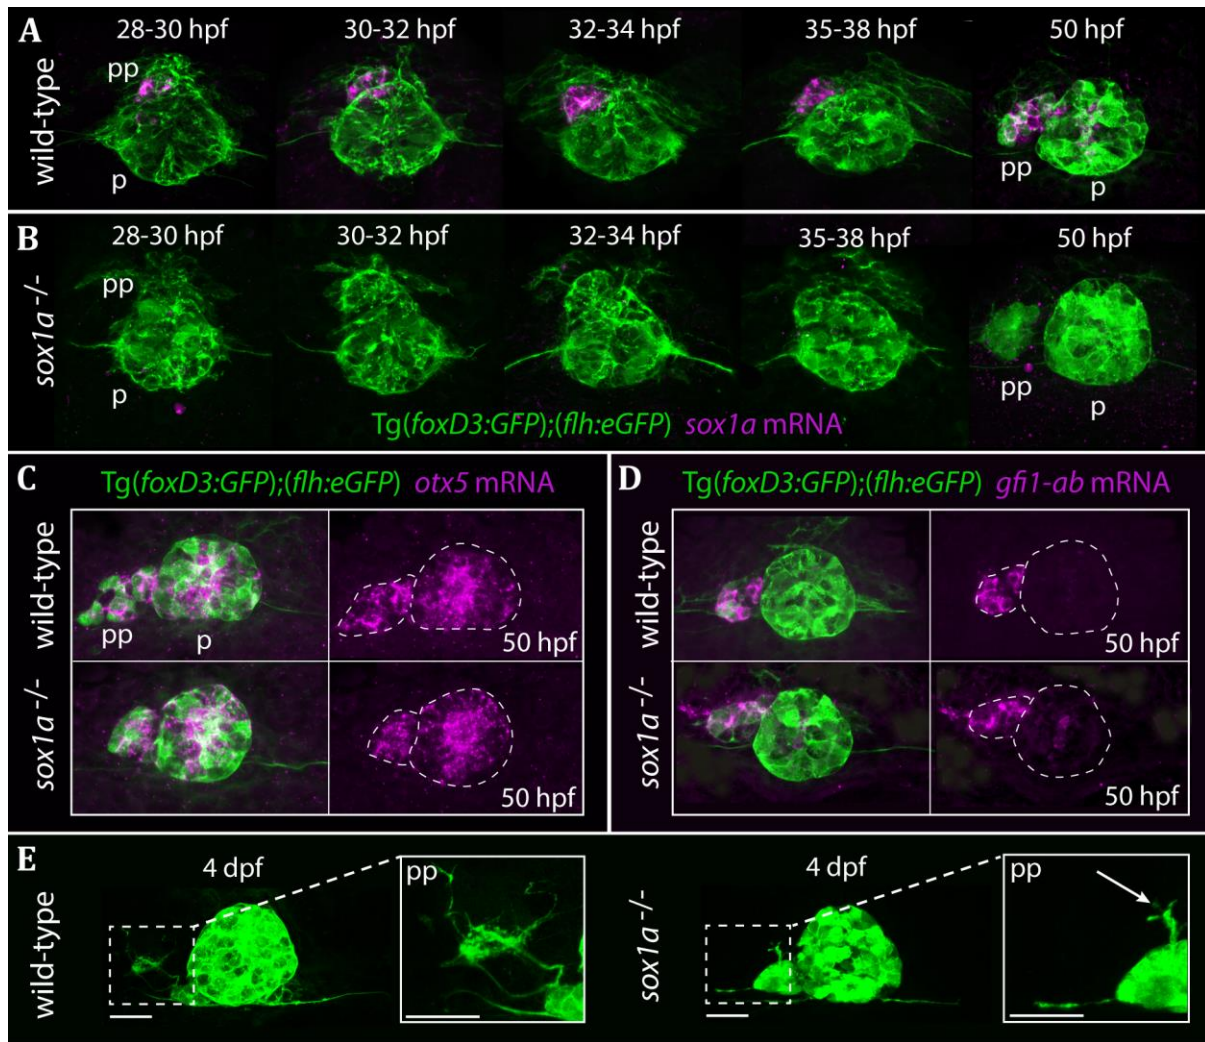

**Figure 2: The parapineal is specified and migrates normally in *sox1a*<sup>-/-</sup> mutants.**

830 All images show dorsal views of the epithalami of wild-type or *sox1a* mutant embryos with expression of *Tg(foxD3:GFP)<sup>zf104</sup>* and *Tg(flh:eGFP)<sup>U711</sup>* transgenes (green) in the pineal (p) and the parapineal (pp). mRNA expression of genes indicated is shown in magenta.

(A-B) Time-course of parapineal migration in *Tg(foxD3:GFP);(flh:eGFP)* (A) and *sox1a*<sup>-/-</sup> *Tg(foxD3:GFP);(flh:eGFP)* (B) embryos. Note the absence of *sox1a* mRNA in the parapineal cells of the *sox1a*<sup>-/-</sup> mutants.

835 (C-D) *otx5* (pineal and parapineal) and *gfi1ab* (parapineal) mRNA expression in wild-type and *sox1a*<sup>-/-</sup> mutant embryos at 50 hpf.

(E) Efferent parapineal projections to the left dHb in wild-type and *sox1a* mutant embryos at 4 dpf. Note the stunted projection arising from the *sox1a*<sup>-/-</sup> parapineal (arrow). Scale bars 25  $\mu$ m.

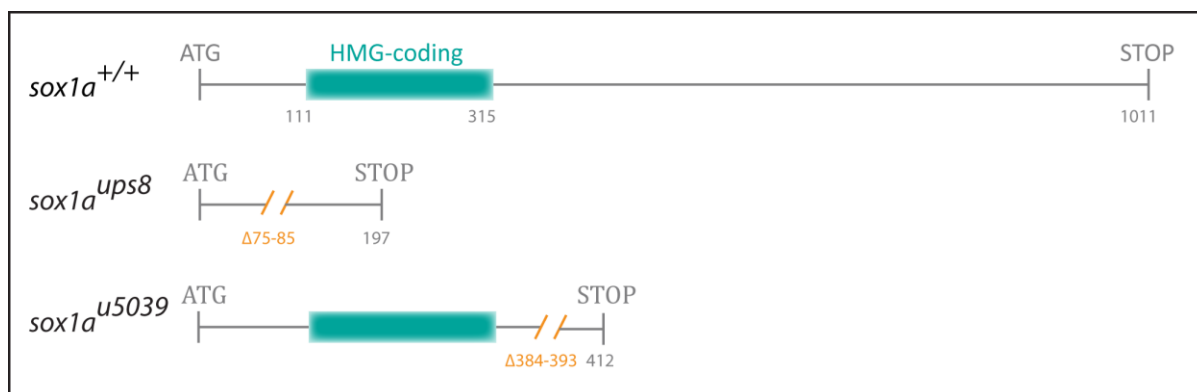

840 **Figure 2 – figure supplement 1: Generation of mutant *sox1a* alleles**

An 11 bp (*sox1a*<sup>ups8</sup>) and a 10 bp (*sox1a*<sup>u5039</sup>) deletion (orange) was introduced into the single 1011 bp exon of *sox1a*, leading to a premature stop codon at positions 197 and 412, respectively. In *sox1a*<sup>ups8</sup>, the deletion leads to disruption of the sequence coding for the HMG DNA binding domain (blue), whereas in *sox1a*<sup>u5039</sup>, the HMG domain sequence is intact.

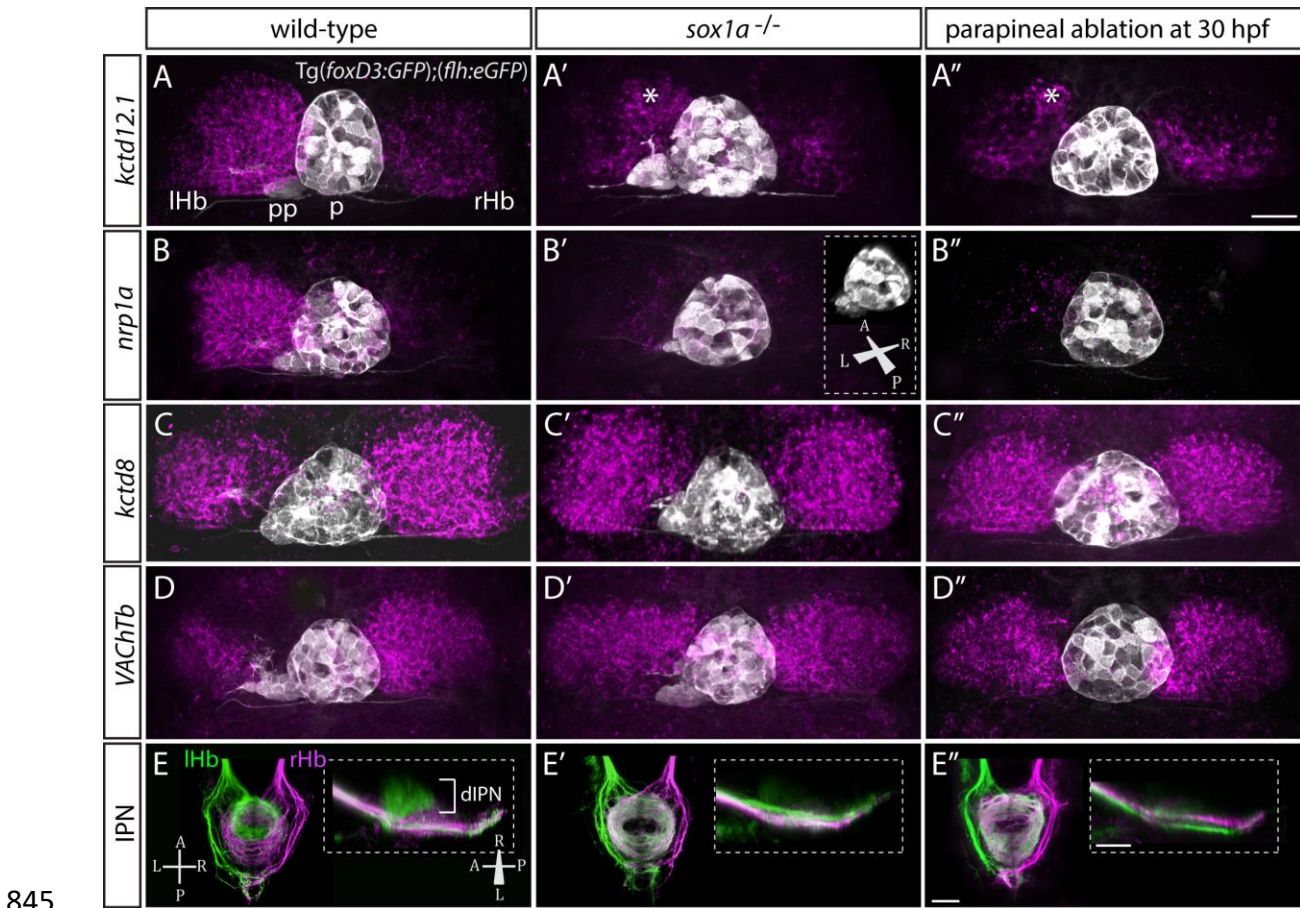

**Figure 3: *sox1a*<sup>-/-</sup> mutants show a double-right habenular phenotype.**

**(A-D'')** Dorsal views of the epithalami of wild-type (A-D), *sox1a* mutant (A'-D') and parapineal-ablated larvae at 4 dpf showing expression of Tg(*foxD3:GFP*)<sup>zf104</sup> and Tg(*flh:eGFP*)<sup>U711</sup> transgenes (grey) in the pineal (p) and the parapineal (pp). Habenular mRNA expression of genes indicated on the left is shown in magenta (lHb – left habenula, rHb – right habenula, asterisk – residual asymmetry). Scale bar 25 μm.

**(E-E'')** Dorsal (left images) and lateral (right images) views of the midbrain interpeduncular nucleus (IPN) labelled by anterograde tracing of axons from left dorsal habenula (lHb, green) and right dorsal habenula (rHb, magenta) at 4 dpf. Note the loss of dorsal IPN (dIPN) innervation by the left habenula in the *sox1a*<sup>-/-</sup> mutant (E') and parapineal-ablated larva (E''). Scale bars 25 μm.

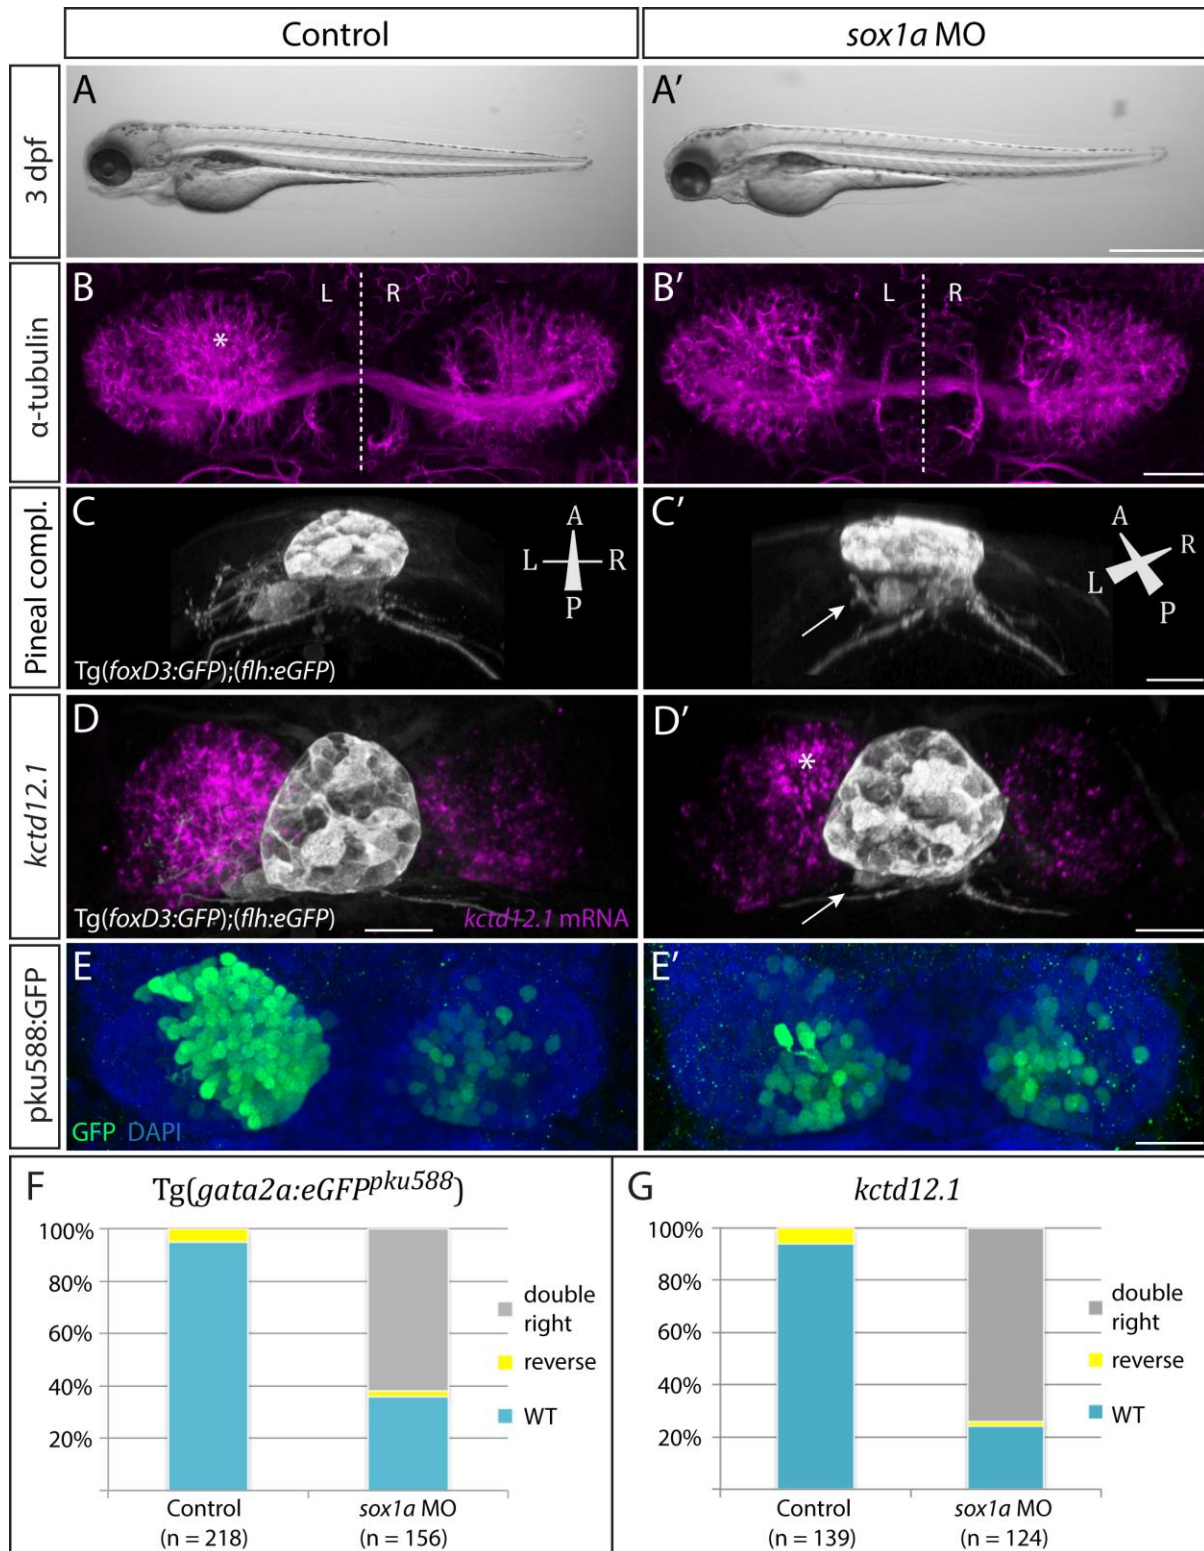

**Figure 3 – figure supplement 1: *sox1a* morphants show a double-right habenular phenotype comparable to *sox1a* mutants.**

**(A-A')** *sox1a* morpholino (MO)-injected embryo showing normal overall morphology at 3 dpf. Scale bar 500  $\mu$ m.

**(B-B')** Dense left dHb neuropil domain (asterisk) is reduced in *sox1a* morphants at 4 dpf (acetylated  $\alpha$ -tubulin immunostaining).



865 (C-C') MO injections into *Tg(foxD3:GFP);(flh:eGFP)* transgenic fish reveal that the parapineal migrates to its normal position next to the pineal stalk by 4 dpf in the *sox1a* morphant, but has shortened axonal projections (arrow in C').

(D-D') Left habenula *kctd12.1* mRNA expression at 4 dpf is decreased in the *sox1a* morphant despite normal parapineal migration (arrow), with only a small residual asymmetric domain (asterisk).

870 (E-E') Numbers of GFP-positive neurons in *Tg(gata2a:eGFPpku588)* line labelling the left-dominant lateral domains of the dHb (located medially in larval zebrafish) is reduced in the 4 dpf *sox1a* morphant. Scale bars (B-E') 25  $\mu$ m.

(F-G) Percentages of larvae with double-right, wild-type and reversed habenular phenotypes in controls and upon *sox1a* MO injections. Scoring is based on *Tg(gata2a:eGFPpku588)* GFP expression (E-E', F) and *kctd12.1* mRNA expression (D-D', G) at 4 dpf.

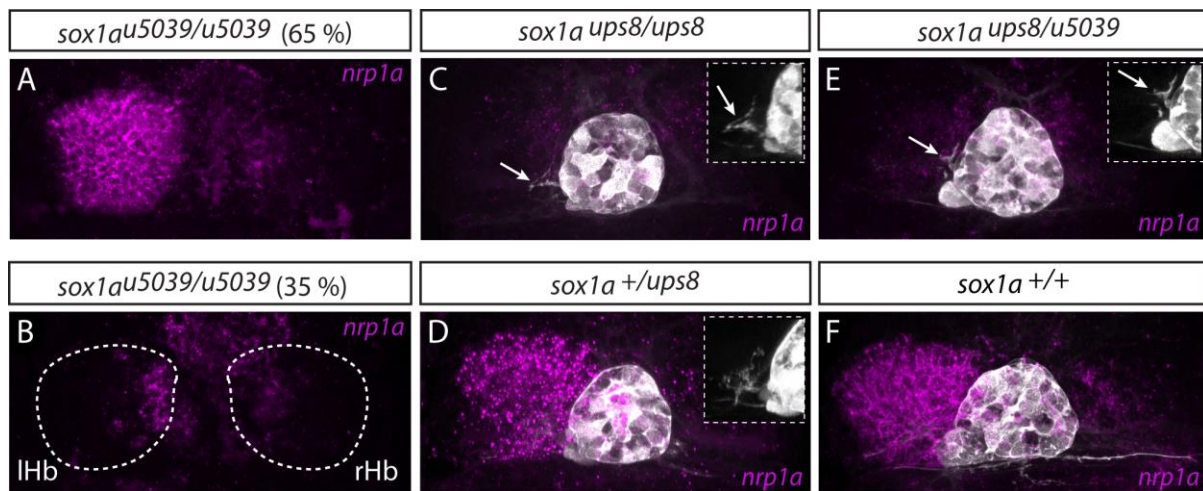

875 **Figure 3 – figure supplement 2: Two *sox1a* mutant alleles do not complement each other**

(A-B) The *sox1a*<sup>u5039</sup> allele shows incomplete penetrance with ~65 % (n = 117/181) of homozygous mutants having a double-right dHb as confirmed by *nrp1a* mRNA *in situ* hybridisation at 4 dpf. lHb – left habenula, rHb – right habenula.

880 (C-D,F) *sox1a*<sup>ups8</sup> allele exhibits complete penetrance with all homozygous mutants having a double-right dHb, as confirmed by *nrp1a* mRNA *in situ* hybridisation at 4 dpf in *Tg(foxD3:GFP);(flh:eGFP)* background with GFP expressed in the pineal complex (C and Figure 3). *sox1a*<sup>+/<sup>ups8</sup> heterozygotes (n = 45) (D) have a phenotype identical to wild-type siblings (F).</sup>

885 (E) The two mutant *sox1a* alleles do not complement each other – all trans-heterozygote larvae are double-right for *nrp1a* mRNA expression (n = 45/45). Similar to *sox1a*<sup>ups8</sup>, trans-heterozygotes of the two mutant alleles exhibit stalled outgrowth of parapineal axons (white arrows in C and E).

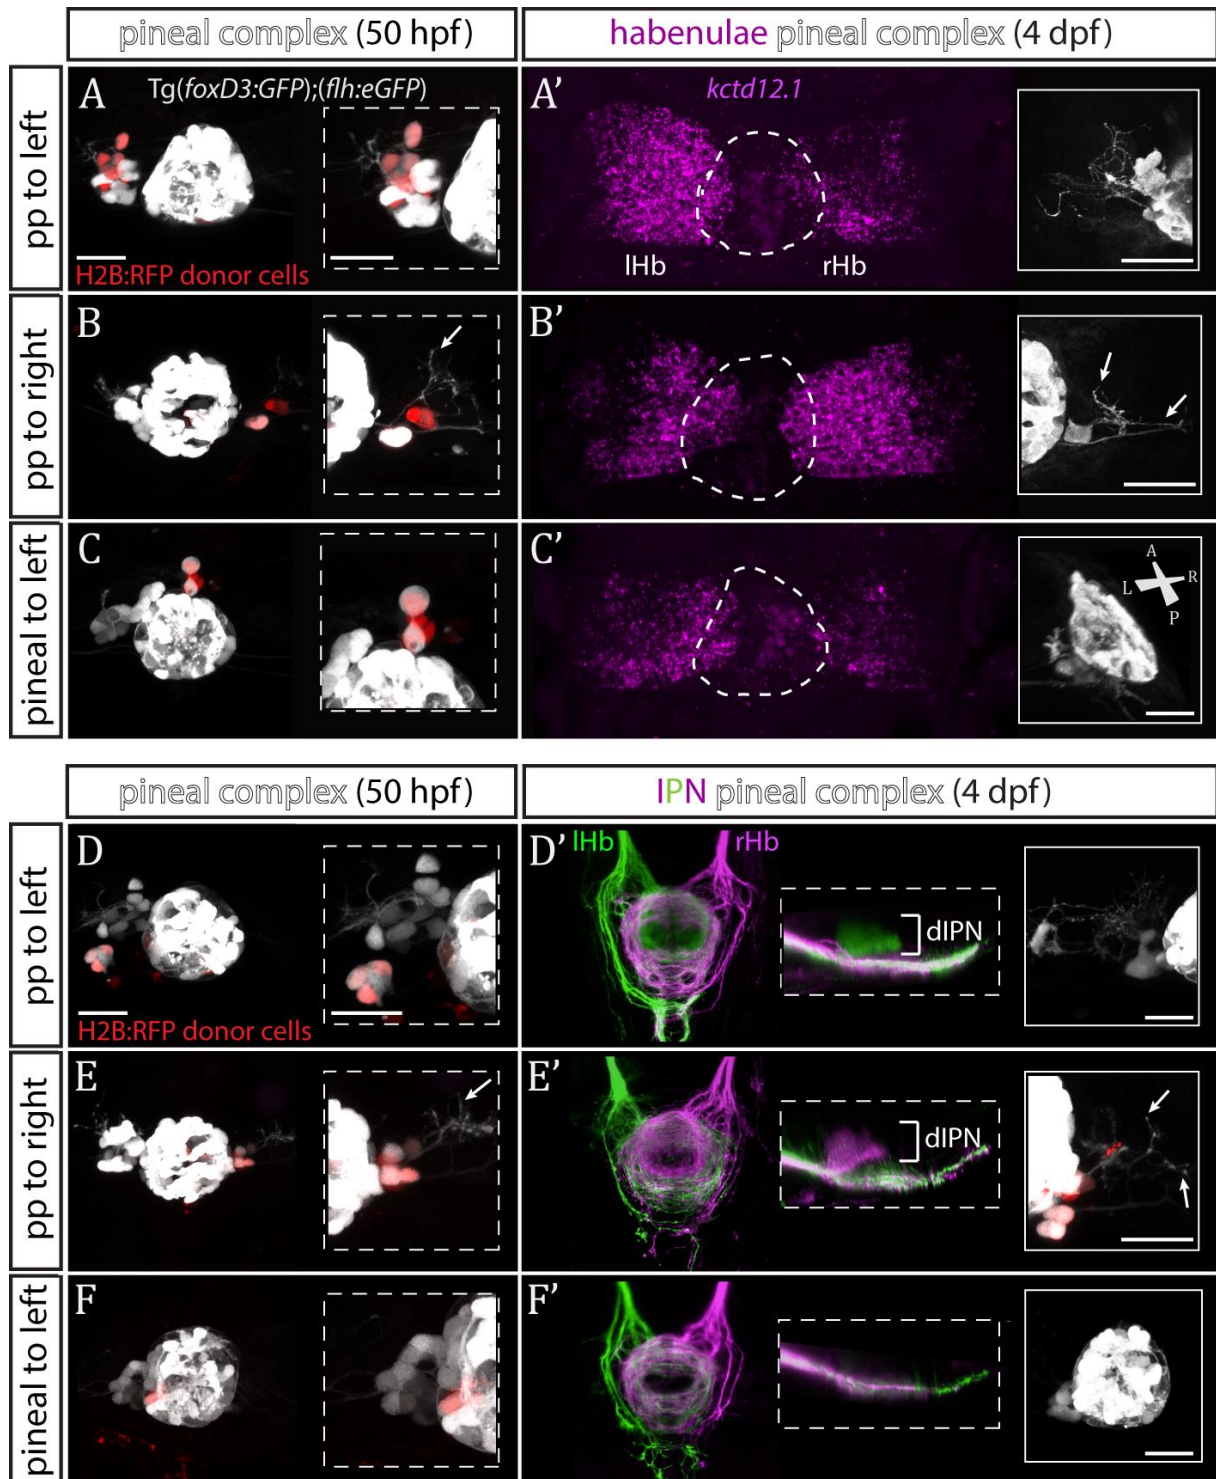

**Figure 4: Transplanted wild-type parapineal cells rescue habenular asymmetry in *sox1a*<sup>-/-</sup> mutants.**

890

(A-F) Parapineal (pp) cells from an *H2B:RFP* mRNA-injected *Tg(foxD3:GFP);(flh:eGFP)* donor embryo transplanted to the left (A, D) or right (B, E) side of a *Tg(foxD3:GFP);(flh:eGFP) sox1a*<sup>-/-</sup> recipient at 32 hpf send projections to the habenula at 50 hpf (white arrows in B and E), as shown by live-imaging. Transplanted pineal cells (C, F) do not send projections to the habenula and locate to the midline (C) or reincorporate into the pineal (F) by 50 hpf. Scale bars 25 μm.

(A'-F') By 4 dpf, the habenula adjacent to the transplanted wild-type parapineal cells acquires a left habenula phenotype in *sox1a*<sup>-/-</sup> mutants as shown by *kctd12.1* mRNA expression (A',B') and

895 anterograde labelling of habenula-IPN projections (dorsal and lateral views) (D',E'). *sox1a*<sup>-/-</sup> larvae with pineal cell transplant have double-right habenulae (C',F'). Solid boxes show the transplanted parapineal cells at 4 dpf, sending out long projections (arrows in B' and E') to the adjacent habenula. The whole pineal complex is shown for the pineal cell transplanted larvae (C',F'). IHb – left habenula, rHb – right habenula, dIPN – dorsal interpeduncular nucleus. Scale bars 25  $\mu$ m.

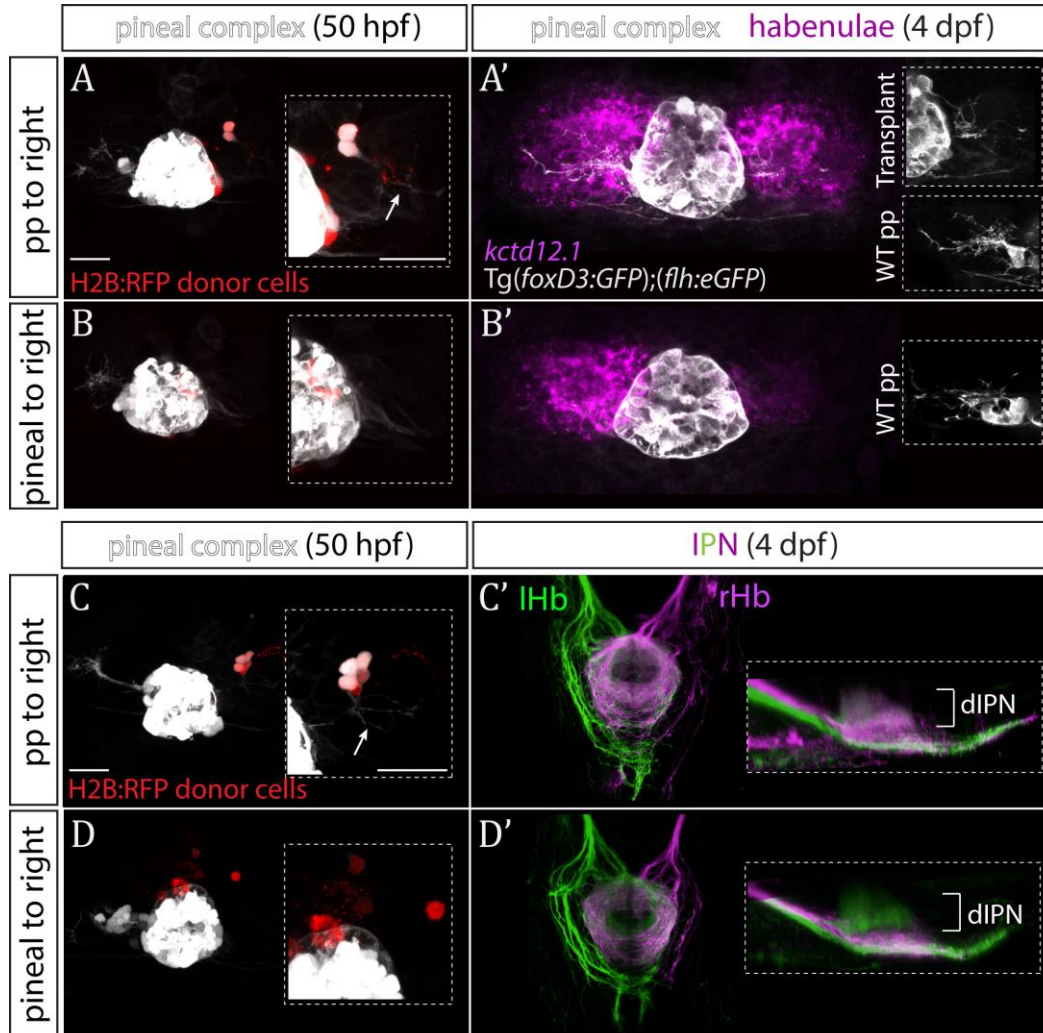

900

**Figure 4 – figure supplement 1: Parapineal cells impose left habenula character on right dorsal habenula neurons**

(A-D) Parapineal cells from an *H2B:RFP* mRNA-injected *Tg(foxD3:GFP);(flh:eGFP)* donor embryo transplanted to the right side of a *Tg(foxD3:GFP);(flh:eGFP)* recipient at 32 hpf send projections to the habenula at 50 hpf (arrows in A and C), whereas transplanted pineal cells (B, D) do not (but reintegrate into the pineal and/or locate to the midline). Scale bars 25  $\mu$ m.

905

(A'-D') By 4 dpf, the right habenula adjacent to the transplanted parapineal cells acquires a left habenula phenotype, as shown by increase in *kctd12.1* mRNA expression (A') and anterogradely labelled efferent habenula-IPN projections (dorsal and lateral views) (C'). Note the innervation of dorsal IPN (dIPN) by both, the left and right habenula (IHb, rHb) in parapineal-transplanted larvae. Larvae with pineal cell transplants exhibit a wild-type habenular phenotype at 4 dpf (B',D').

910

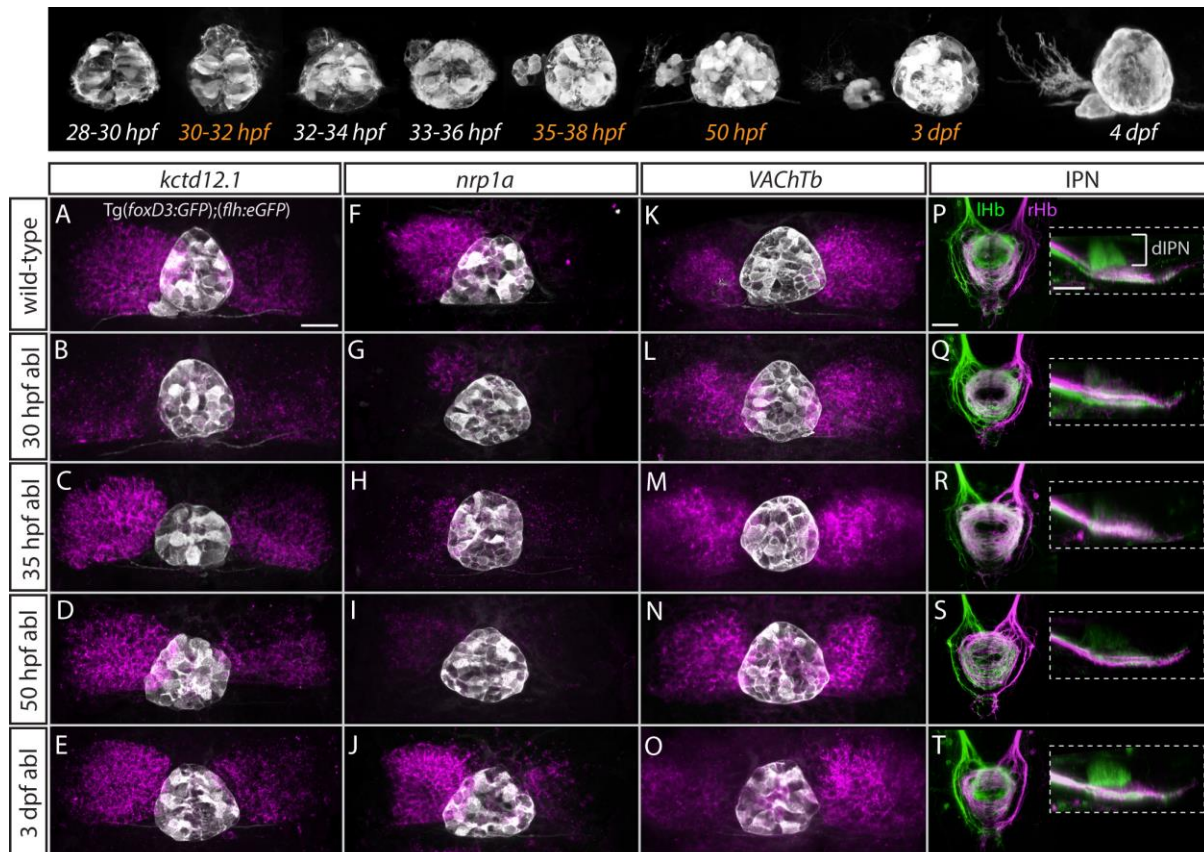

**Figure 5: Step-wise regulation of habenular asymmetries by the parapineal.**

915 The top panel shows the time-course of parapineal development in *Tg(foxD3:GFP);(flh:eGFP)* fish. The time-points selected for parapineal ablations are shown in orange. Scale bars 25  $\mu$ m.

(A-O) Dorsal views of the epithalami of wild-type and parapineal-ablated larvae at 4 dpf showing expression of *(foxD3:GFP)<sup>zf104</sup>* and *(flh:eGFP)<sup>U711</sup>* transgenes (grey) in the pineal complex. Habenular mRNA expression of *kctd12.1*, *nrp1a* and *VAcHtb* is shown in magenta. Parapineal ablations were carried out at time-points indicated on the left.

920 (P-T) Dorsal (left images) and lateral (right images) views of the interpeduncular nucleus labelled by anterograde tracing of the axons from the left dorsal habenula (IHb, green) and right dorsal habenula (rHb, magenta) at 4 dpf. Parapineal ablations were carried out at time-points indicated on the left. dIPN – dorsal interpeduncular nucleus.

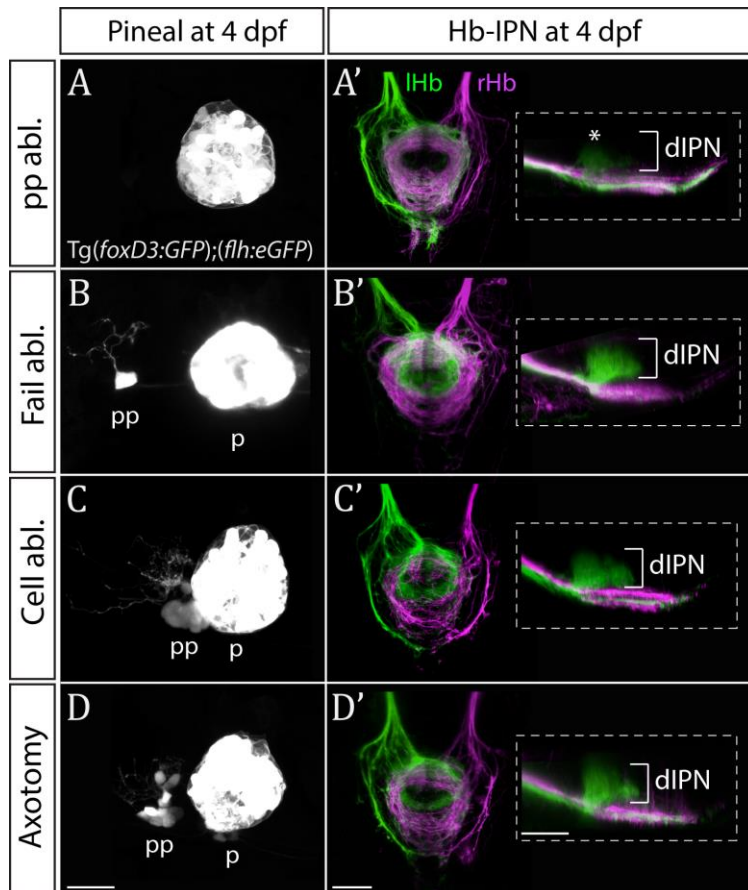

925 **Figure 5 – figure supplement 1: Only ablation of all parapineal cells leads to loss of habenular asymmetries**

(A-D) Live-imaging of the pineal complex at 4 dpf showing expression of Tg(*foxD3*:GFP)<sup>zf104</sup> and Tg(*flh*:eGFP)<sup>U711</sup> transgenes in the pineal (p) and the parapineal (pp). Parapineal ablations were carried out at 50 hpf, parapineal axotomies repeatedly at 50, 60 and 72 hpf. Fail ablation (n=7)  
930 demarks one or two parapineal cells left unablated (B), cell ablation (n=4) is ablation of 2-3 parapineal cells (C) and axotomies (n=5) were carried out by severing the parapineal axon bundle approximately 10 μm from the cell bodies, which often also disrupted the compact structure of the parapineal (D).

(A'-D') Dorsal and lateral views of the interpeduncular nucleus labelled by anterograde tracing of the axons from the left dorsal habenula (IHb, green) and right dorsal habenula (rHb, magenta) at 4 dpf.  
935 Note that innervation of dorsal interpeduncular nucleus (dIPN) from the left habenula is lost only upon ablation of all parapineal cells. The asterisk indicates a small tuft of neurites in the dorsal anterior IPN that are present upon complete parapineal ablation (Bianco et al., 2008) and can also be detected in *sox1a* mutants (Fig. 3E'). All scale bars 25 μm

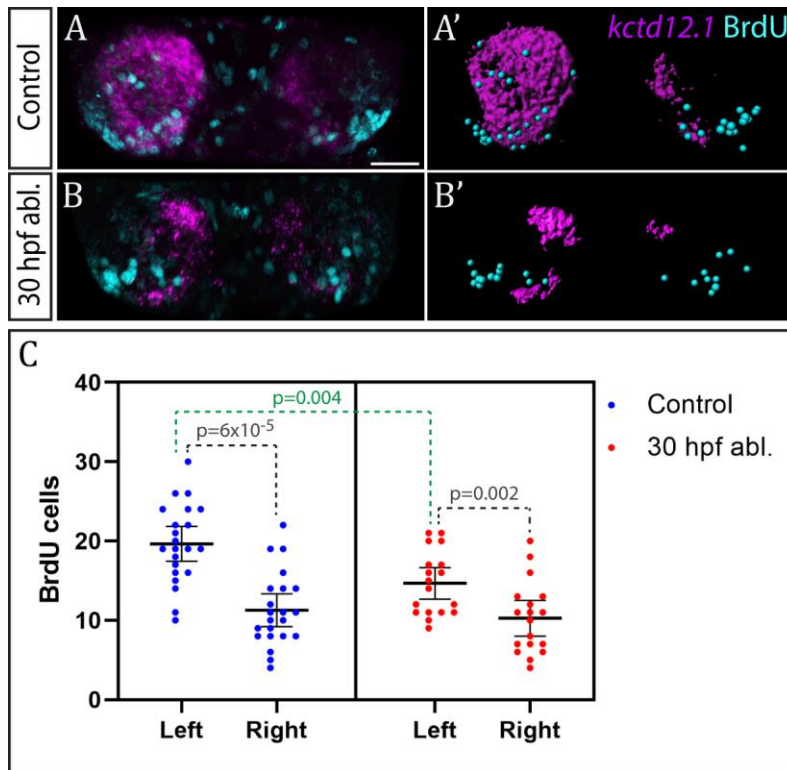

940

**Figure 6: Neurogenesis is reduced in the left habenula upon early parapineal ablation.**

(A-B') Confocal images (A-B) and reconstructions (A'-B') of *kctd12.1* mRNA *in situ* hybridisation (magenta) and BrdU immunohistochemistry (cyan) in the dHb of control (A, A') and parapineal-ablated larvae (B, B') at 4 dpf. Ablations were carried out at 30 hpf and BrdU pulse given at 32 hpf. Scale bar 25  $\mu$ m.

945

(C) Plots showing the number of BrdU-positive cells born at 32 hpf in the left and right dHb of control (n=22) and parapineal-ablated (n=18) embryos. Cells were counted as shown in A' and B', mean and 95% CI are shown. The reduction in left dHb BrdU-positive cells upon 30 hpf ablation (p=0.004, Wilcoxon-Mann-Whitney test) is indicated in green.
